# Supplementary material for: Design of dual MMP-2/HDAC-8 inhibitors by pharmacophore mapping, molecular docking, synthesis and biological activity
Source: Royal Society of Chemistry journal article supplement (doi:10.1039/c5ra12606a), 2015-01-01
Supplement: c5ra12606a1.pdf [file c5ra12606a1.pdf]

### Supporting information

**Table S1.** Molecular dataset of HDAC-8 inhibitors used for the development and validation of ligand-based pharmacophore models.

| Cpd. | SMILES (Whole Molecule)                                                          | IC <sub>50</sub> (nM) | pIC <sub>50</sub> | Ref |
|------|----------------------------------------------------------------------------------|-----------------------|-------------------|-----|
| 01   | <chem>CC(C)(C)OC(=O)N1Cc2cc(ccc2C[C@H]1C(=O)Nc1ccc(cc1)c1ccccc1)OCC(=O)NO</chem> | 1980.00               | 5.703             | 1   |
| 02   | <chem>ONC(=O)COc1ccc2c(c1)C[N+H2][C@@H](C2)C(=O)Nc1ccc(cc1)c1ccccc1</chem>       | 2210.00               | 5.656             | 1   |
| 03   | <chem>CC(C)(C)OC(=O)N1Cc2cc(ccc2C[C@H]1C(=O)Nc1ccccc1)OCC(=O)NO</chem>           | 1290.00               | 5.889             | 1   |
| 04   | <chem>ONC(=O)COc1ccc2c(c1)CN([C@@H](C2)C(=O)NCCc1ccccc1)C(=O)OCc1ccccc1</chem>   | 580.00                | 6.237             | 1   |
| 05   | <chem>ONC(=O)COc1ccc2c(c1)C[N+H2][C@@H](C2)C(=O)Nc1cccc2ccccc12</chem>           | 1060.00               | 5.975             | 1   |
| 06   | <chem>CC(C)(C)OC(=O)N1Cc2cc(ccc2C[C@H]1C(=O)NCCc1ccccc1)OCC(=O)NO</chem>         | 2670.00               | 5.573             | 1   |
| 07   | <chem>CC(C)(C)OC(=O)N1Cc2cc(ccc2C[C@H]1C(=O)Nc1cccc2ccccc12)OCC(=O)NO</chem>     | 4250.00               | 5.372             | 1   |
| 08   | <chem>Cc1cccc(c1)NC(=O)[C@@H]1Cc2ccc(cc2C[N+H2]1)OCC(=O)NO</chem>                | 3620.00               | 5.441             | 1   |
| 09   | <chem>CC(C)(C)OC(=O)N1Cc2cc(ccc2C[C@H]1C(=O)NCCc1ccccc1)OCC(=O)NO</chem>         | 3410.00               | 5.467             | 1   |
| 10   | <chem>ONC(=O)COc1ccc2c(c1)C[N+H2][C@@H](C2)C(=O)Nc1ccccc1</chem>                 | 8210.00               | 5.086             | 1   |
| 11   | <chem>Cc1cccc(c1)NC(=O)[C@@H]1Cc2ccc(cc2CN1C(=O)OC(C)(C)C)OCC(=O)NO</chem>       | 1770.00               | 5.752             | 1   |
| 12   | <chem>Cc1ccc(cc1)NC(=O)[C@@H]1Cc2ccc(cc2CN1C(=O)OC(C)(C)C)OCC(=O)NO</chem>       | 1650.00               | 5.783             | 1   |
| 13   | <chem>Cc1ccccc1NC(=O)[C@@H]1Cc2ccc(cc2C[N+H2]1)OCC(=O)NO</chem>                  | 4130.00               | 5.384             | 1   |
| 14   | <chem>CC(C)(C)OC(=O)N1Cc2cc(ccc2C[C@H]1C(=O)Nc1cccc(c1)Cl)OCC(=O)NO</chem>       | 1170.00               | 5.932             | 1   |
| 15   | <chem>ONC(=O)COc1ccc2c(c1)C[N+H2][C@@H](C2)C(=O)Nc1ccc(c(c1)Cl)F</chem>          | 3340.00               | 5.476             | 1   |
| 16   | <chem>COc1ccc(cc1)NC(=O)[C@@H]1Cc2ccc(cc2CN1C(=O)OC(C)(C)C)OCC(=O)NO</chem>      | 1000.00               | 6.000             | 1   |
| 17   | <chem>Cc1ccccc1NC(=O)[C@@H]1Cc2ccc(cc2CN1C(=O)OC(C)(C)C)OCC(=O)NO</chem>         | 4000.00               | 5.398             | 1   |
| 18   | <chem>ONC(=O)COc1ccc2c(c1)CN([C@@H](C2)C(=O)NCCc1ccccc1</chem>                   | 5100.00               | 5.292             | 1   |
| 19   | <chem>COc1ccc(cc1)NC(=O)[C@@H]1Cc2ccc(cc2C[N+H2]1)OCC(=O)NO</chem>               | 5570.00               | 5.254             | 1   |
| 20   | <chem>ONC(=O)COc1ccc2c(c1)C[N+H2][C@@H](C2)C(=O)Nc1ccc(cc1)F</chem>              | 3230.00               | 5.491             | 1   |
| 21   | <chem>CC(C)(C)OC(=O)N1Cc2cc(ccc2C[C@H]1C(=O)Nc1ccc(cc1)F)OCC(=O)NO</chem>        | 2560.00               | 5.592             | 1   |
| 22   | <chem>Cc1ccc(cc1)NC(=O)[C@@H]1Cc2ccc(cc2C[N+H2]1)OCC(=O)NO</chem>                | 3820.00               | 5.418             | 1   |
| 23   | <chem>ONC(=O)COc1ccc2c(c1)C[N+H2][C@@H](C2)C(=O)NCCc1ccccc1</chem>               | 4070.00               | 5.390             | 1   |
| 24   | <chem>ONC(=O)COc1ccc2c(c1)C[N+H2][C@@H](C2)C(=O)Nc1cccc(c1)Cl</chem>             | 3200.00               | 5.495             | 1   |
| 25   | <chem>Cc1ccc(c(c1)C)NC(=O)[C@@H]1Cc2ccc(cc2CN1C(=O)OC(C)(C)C)OCC(=O)NO</chem>    | 3780.00               | 5.423             | 1   |

|    |                                                                                   |          |       |   |
|----|-----------------------------------------------------------------------------------|----------|-------|---|
| 26 | CC(C)(C)OC(=O)N1Cc2cc(ccc2C[C@H]1C(=O)Nc1ccc(c(c1)Cl)F)OCC(=O)NO                  | 1550.00  | 5.810 | 1 |
| 27 | Cc1ccc(c(c1)C)NC(=O)[C@@H]1Cc2ccc(cc2C[N+H2]1)OCC(=O)NO                           | 3390.00  | 5.470 | 1 |
| 28 | CCCCCNC(=O)[C@@H]1Cc2ccc(cc2CN1C(=O)OC(C)(C)C)OCC(=O)NO                           | 4420.00  | 5.355 | 1 |
| 29 | CC(C)(C)NC(=O)[C@@H]1Cc2ccc(cc2CN1C(=O)OC(C)(C)C)OCC(=O)NO                        | 4580.00  | 5.339 | 1 |
| 30 | CCCCCNC(=O)[C@@H]1Cc2ccc(cc2CN1C(=O)OC(C)(C)C)OCC(=O)NO                           | 3020.00  | 5.520 | 1 |
| 31 | CCCCCNC(=O)[C@@H]1Cc2ccc(cc2C[N+H2]1)OCC(=O)NO                                    | 3540.00  | 5.451 | 1 |
| 32 | CCCCCNC(=O)[C@@H]1Cc2ccc(cc2C[N+H2]1)OCC(=O)NO                                    | 5770.00  | 5.239 | 1 |
| 33 | CC(C)(C)NC(=O)[C@@H]1Cc2ccc(cc2CN1)OCC(=O)NO                                      | 12170.00 | 4.915 | 1 |
| 34 | COc1ccc(cc1)NC(=O)[C@H](Cc1ccc(cc1)OCC(=O)NO)NC(=O)Cc1ccccc1                      | 63.00    | 7.201 | 2 |
| 35 | COc1ccc(cc1)NC(=O)[C@H](Cc1ccc(cc1)OCC(=O)NO)NC(=O)CCc1ccccc1                     | 90.00    | 7.046 | 2 |
| 36 | ONC(=O)COc1ccc(cc1)C[C@H](NC(=O)OCc1ccccc1)C(=O)Nc1ccccc1                         | 197.00   | 6.706 | 2 |
| 37 | COc1ccc(cc1)NC(=O)[C@H](Cc1ccc(cc1)OCC(=O)NO)NCCCc1ccccc1                         | 922.00   | 6.035 | 2 |
| 38 | COc1ccc(cc1)NC(=O)[C@H](Cc1ccc(cc1)OCC(=O)NO)NC(=O)CCCc1ccccc1                    | 86.00    | 7.066 | 2 |
| 39 | CC(C)(C)OC(=O)N[C@@H](Cc1ccc(cc1)OCC(=O)NO)C(=O)Nc1ccccc1                         | 227.00   | 6.644 | 2 |
| 40 | COc1ccc(cc1)NC(=O)[C@H](Cc1ccc(cc1)OCC(=O)NO)NC(=O)c1ccccc1                       | 87.00    | 7.060 | 2 |
| 41 | COc1ccc(cc1)NC(=O)[C@H](Cc1ccc(cc1)OCC(=O)NO)NC(=O)OCc1ccccc1                     | 120.00   | 6.921 | 2 |
| 42 | COc1ccc(cc1)NC(=O)[C@H](Cc1ccc(cc1)OCC(=O)NO)[N+H2]CCc1ccccc1                     | 660.00   | 6.180 | 2 |
| 43 | ONC(=O)COc1ccc(cc1)C[C@H](NC(=O)OCc1ccccc1)C(=O)Nc1ccc(c(c1)Cl)                   | 213.00   | 6.672 | 2 |
| 44 | COc1ccc(cc1)NC(=O)[C@H](Cc1ccc(cc1)OCC(=O)NO)NCc1ccccc1                           | 1180.00  | 5.928 | 2 |
| 45 | ONC(=O)COc1ccc(cc1)C[C@H](NC(=O)CCc1ccccc1)C(=O)Nc1ccccc1                         | 151.00   | 6.821 | 2 |
| 46 | [N+H3][C@@H](Cc1ccc(cc1)OCC(=O)NO)C(=O)Nc1ccccc1                                  | 467.00   | 6.331 | 2 |
| 47 | CC(C)(C)OC(=O)N[C@@H](Cc1ccccc1)C(=O)N1CC2(C[C@H]1C(=O)NCCCCC(=O)NO)SCCS2         | 35.00    | 7.456 | 3 |
| 48 | CC(C)(C)OC(=O)N[C@@H](Cc1c[nH]c2ccccc12)C(=O)N1CC2(C[C@H]1C(=O)NCCCCC(=O)NO)SCCS2 | 140.00   | 6.854 | 3 |
| 49 | CC(C)(C)OC(=O)N[C@@H](Cc1ccc(cc1)O)C(=O)N1CC2(C[C@H]1C(=O)NCCCCC(=O)NO)SCCS2      | 21.00    | 7.678 | 3 |
| 50 | N[C@@H](Cc1c[nH]c2ccccc12)C(=O)N1CC2(C[C@H]1C(=O)NCCCCC(=O)NO)SCCS2               | 690.00   | 6.161 | 3 |
| 51 | [N+H3][C@@H](Cc1ccc(cc1)O)C(=O)N1CC2(C[C@H]1C(=O)NCCCCC(=O)NO)SCCS2               | 490.00   | 6.310 | 3 |
| 52 | [N+H3][C@@H](Cc1ccccc1)C(=O)N1CC2(C[C@H]1C(=O)NCCCCC(=O)NO)SCCS2                  | 840.00   | 6.076 | 3 |
| 53 | ONC(=O)CCCCC(=O)Nc1ccccc1                                                         | 1480.00  | 5.830 | 3 |
| 54 | CC(C)(C)OC(=O)N1CCC[C@H]1C(=O)N1CC2(C[C@H]1C(=O)NCCCCC(=O)NO)SCCS2                | 760.00   | 6.119 | 3 |
| 55 | CC(C)C[C@H]([N+H3])C(=O)N1CC2(C[C@H]1C(=O)NCCCCC(=O)NO)SCCS2                      | 920.00   | 6.036 | 3 |

|    |                                                                                                    |          |       |   |
|----|----------------------------------------------------------------------------------------------------|----------|-------|---|
| 56 | CC(C)(C)OC(=O)NCCCC[C@H](NC(=O)OC(C)(C)C(=O)N1CC2(C[C@H]1C(=O)NCCCCC(=O)NO)SCCS2                   | 350.00   | 6.456 | 3 |
| 57 | CC(C)(C)OC(=O)NCCCC(=O)N1CC2(C[C@H]1C(=O)NCCCCC(=O)NO)SCCS2                                        | 960.00   | 6.018 | 3 |
| 58 | CC(C)(C)OC(=O)NCC(=O)N1CC2(C[C@H]1C(=O)NCCCCC(=O)NO)SCCS2                                          | 1190.00  | 5.924 | 3 |
| 59 | [N+H3][C@@H](CO)C(=O)N1CC2(C[C@H]1C(=O)NCCCCC(=O)NO)SCCS2                                          | 2520.00  | 5.599 | 3 |
| 60 | [N+H3]CCCC(=O)N1CC2(C[C@H]1C(=O)NCCCCC(=O)NO)SCCS2                                                 | 4120.00  | 5.385 | 3 |
| 61 | CC(C)(C)OC(=O)N1CC2(C[C@H]1C(=O)NCCCCC(=O)NO)SCCS2                                                 | 1860.00  | 5.730 | 3 |
| 62 | CC[C@H](C)[C@H]([N+H3])C(=O)N1CC2(C[C@H]1C(=O)NCCCCC(=O)NO)SCCS2                                   | 1070.00  | 5.971 | 3 |
| 63 | CC(C)C[C@H](NC(=O)OC(C)(C)C(=O)N1CC2(C[C@H]1C(=O)NCCCCC(=O)NO)SCCS2                                | 600.00   | 6.222 | 3 |
| 64 | CC(C)[C@H](NC(=O)OC(C)(C)C(=O)N1CC2(C[C@H]1C(=O)NCCCCC(=O)NO)SCCS2                                 | 720.00   | 6.143 | 3 |
| 65 | ONC(=O)CCCCNC(=O)[C@@H]1CC2(CN1C(=O)C1CC[N+H2]CC1)SCCS2                                            | 2790.00  | 5.554 | 3 |
| 66 | CC(C)(C)OC(=O)N[C@@H](CO)C(=O)N1CC2(C[C@H]1C(=O)NCCCCC(=O)NO)SCCS2                                 | 870.00   | 6.060 | 3 |
| 67 | CC[C@H](C)[C@H](NC(=O)OC(C)(C)C(=O)N1CC2(C[C@H]1C(=O)NCCCCC(=O)NO)SCCS2                            | 1310.00  | 5.883 | 3 |
| 68 | [N+H3]CCC(=O)N1CC2(C[C@H]1C(=O)NCCCCC(=O)NO)SCCS2                                                  | 1930.00  | 5.714 | 3 |
| 69 | CC(C)(C)OC(=O)NCCC(=O)N1CC2(C[C@H]1C(=O)NCCCCC(=O)NO)SCCS2                                         | 1900.00  | 5.721 | 3 |
| 70 | C[C@H](NC(=O)OC(C)(C)C(=O)N1CC2(C[C@H]1C(=O)NCCCCC(=O)NO)SCCS2                                     | 1150.00  | 5.939 | 3 |
| 71 | C[C@H]([N+H3])C(=O)N1CC2(C[C@H]1C(=O)NCCCCC(=O)NO)SCCS2                                            | 5900.00  | 5.229 | 3 |
| 72 | [N+H3]CCCC[C@H]([N+H3])C(=O)N1CC2(C[C@H]1C(=O)NCCCCC(=O)NO)SCCS2                                   | 4770.00  | 5.321 | 3 |
| 73 | CC(C)(C)OC(=O)N1CCC(CC1)C(=O)N1CC2(C[C@H]1C(=O)NCCCCC(=O)NO)SCCS2                                  | 1440.00  | 5.842 | 3 |
| 74 | ONC(=O)CCCCNC(=O)[C@@H]1CC2(CN1C(=O)[C@@H]1CCC[N+H2]1)SCCS2                                        | 10280.00 | 4.988 | 3 |
| 75 | [N+H3]CC(=O)N1CC2(C[C@H]1C(=O)NCCCCC(=O)NO)SCCS2                                                   | 1300.00  | 5.886 | 3 |
| 76 | CC(C)[C@H]([N+H3])C(=O)N1CC2(C[C@H]1C(=O)NCCCCC(=O)NO)SCCS2                                        | 1070.00  | 5.971 | 3 |
| 77 | ONC(=O)CCCCNC(=O)[C@@H]1CC2(CN1)SCCS2                                                              | 2590.00  | 5.587 | 3 |
| 78 | COc1ccc(cc1)NC(=O)[C@@H]1Cc2ccc(cc2CN1C(=O)[C@@H](N)Cc1ccccc1)OCC(=O)NO                            | 368.00   | 6.434 | 4 |
| 79 | COc1ccc(cc1)NC(=O)[C@@H]1Cc2ccc(cc2CN1C(=O)Cc1ccccc1)OCC(=O)NO                                     | 141.00   | 6.851 | 4 |
| 80 | CC[C@H](C)[C@H](NC(=O)[C@@H](NC(=O)OC(C)(C)C(=O)N1Cc2cc(ccc2C[C@H]1C(=O)Nc1ccc(cc1)OC)OCC(=O)NO    | 201.00   | 6.697 | 4 |
| 81 | COc1ccc(cc1)NC(=O)[C@@H]1Cc2ccc(cc2CN1C(=O)CNC(=O)OC(C)(C)C)OCC(=O)NO                              | 514.00   | 6.289 | 4 |
| 82 | CC[C@H](C)[C@H](NC(=O)[C@@H]1CCC[N+H2]1)C(=O)N1Cc2cc(ccc2C[C@H]1C(=O)Nc1ccc(cc1)OC)OCC(=O)NO       | 47.00    | 7.328 | 4 |
| 83 | COc1ccc(cc1)NC(=O)[C@@H]1Cc2ccc(cc2CN1C(=O)[C@H](Cc1ccccc1)NC(=O)OC(C)(C)C)OCC(=O)NO               | 103.00   | 6.987 | 4 |
| 84 | CC[C@H](C)[C@H](NC(=O)[C@@H]1CCCNC(=O)OC(C)(C)C(=O)N1Cc2cc(ccc2C[C@H]1C(=O)Nc1ccc(cc1)OC)OCC(=O)NO | 192.00   | 6.717 | 4 |
| 85 | CC[C@H](C)[C@@H](CN1Cc2cc(ccc2C[C@H]1C(=O)Nc1ccc(cc1)OC)OCC(=O)NO)NC(=O)OC(C)(C)C                  | 263.00   | 6.580 | 4 |

|     |                                                                                                                |         |       |   |
|-----|----------------------------------------------------------------------------------------------------------------|---------|-------|---|
| 86  | <chem>COc1ccc(cc1)NC(=O)[C@@H]1Cc2ccc(cc2CN1C(=O)c1ccccc1)OCC(=O)NO</chem>                                     | 164.00  | 6.785 | 4 |
| 87  | <chem>CC[C@H](C)[C@H](NC(=O)OC(C)(C)C(=O)N1Cc2cc(ccc2C[C@H]1C(=O)Nc1ccc(cc1)OC)OCC(=O)NO</chem>                | 139.00  | 6.857 | 4 |
| 88  | <chem>COc1ccc(cc1)NC(=O)[C@@H]1Cc2ccc(cc2CN1C(=O)[C@H](CC(C)C)NC(=O)OC(C)(C)C)OCC(=O)NO</chem>                 | 163.00  | 6.788 | 4 |
| 89  | <chem>COc1ccc(cc1)NC(=O)[C@@H]1Cc2ccc(cc2CN1C(=O)[C@H](NC(=O)OC(C)(C)C)C(C)C)OCC(=O)NO</chem>                  | 104.00  | 6.983 | 4 |
| 90  | <chem>COc1ccc(cc1)NC(=O)[C@@H]1Cc2ccc(cc2CN1C(=O)CCc1ccccc1)OCC(=O)NO</chem>                                   | 502.00  | 6.299 | 4 |
| 91  | <chem>COc1ccc(cc1)NC(=O)[C@@H]1Cc2ccc(cc2CN1C(=O)[C@H]1CCCN1C(=O)OC(C)(C)C)OCC(=O)NO</chem>                    | 212.00  | 6.674 | 4 |
| 92  | <chem>COc1ccc(cc1)NC(=O)[C@@H]1Cc2ccc(cc2CN1CCc1ccccc1)OCC(=O)NO</chem>                                        | 1020.00 | 5.991 | 4 |
| 93  | <chem>CC[C@H](C)[C@@H](CN1Cc2cc(ccc2C[C@H]1C(=O)Nc1ccc(cc1)OC)OCC(=O)NO)NC(=O)CC(C)(C)C</chem>                 | 333.00  | 6.478 | 4 |
| 94  | <chem>CC[C@H](C)[C@H](NC(=O)[C@@H]([N+H3])C(C)C(=O)N1Cc2cc(ccc2C[C@H]1C(=O)Nc1ccc(cc1)OC)OCC(=O)NO</chem>      | 68.00   | 7.167 | 4 |
| 95  | <chem>COc1ccc(cc1)NC(=O)[C@@H]1Cc2ccc(cc2CN1C(=O)[C@H](Cc1ccc(cc1)O)NC(=O)OC(C)(C)C)OCC(=O)NO</chem>           | 175.00  | 6.757 | 4 |
| 96  | <chem>COc1ccc(cc1)NC(=O)[C@@H]1Cc2ccc(cc2CN1C(=O)CCCc1ccccc1)OCC(=O)NO</chem>                                  | 114.00  | 6.943 | 4 |
| 97  | <chem>COc1ccc(cc1)NC(=O)[C@@H]1Cc2ccc(cc2CN1CCCc1ccccc1)OCC(=O)NO</chem>                                       | 1720.00 | 5.764 | 4 |
| 98  | <chem>CC[C@H](C)[C@H](NC(=O)C1CC[N+H2]CC1)C(=O)N1Cc2cc(ccc2C[C@H]1C(=O)Nc1ccc(cc1)OC)OCC(=O)NO</chem>          | 1440.00 | 5.842 | 4 |
| 99  | <chem>COc1ccc(cc1)NC(=O)[C@@H]1Cc2ccc(cc2CN1C(=O)[C@H](C)NC(=O)OC(C)(C)C)OCC(=O)NO</chem>                      | 182.00  | 6.740 | 4 |
| 100 | <chem>COc1ccc(cc1)NC(=O)[C@@H]1Cc2ccc(cc2CN1C(=O)[C@@H]([N+H3])Cc1ccc(cc1)O)OCC(=O)NO</chem>                   | 634.00  | 6.198 | 4 |
| 101 | <chem>ONC(=O)COc1ccc2c(c1)CN([C@@H](C2)C(=O)Nc1ccccc1)C(=O)CCc1ccccc1</chem>                                   | 759.00  | 6.120 | 4 |
| 102 | <chem>ONC(=O)COc1ccc2c(c1)CN([C@@H](C2)C(=O)NCCc1ccccc1)C(=O)CCc1ccccc1</chem>                                 | 692.00  | 6.160 | 4 |
| 103 | <chem>CC[C@H](C)[C@H](NC(=O)C1CCN(CC1)C(=O)OC(C)(C)C(=O)N1Cc2cc(ccc2C[C@H]1C(=O)Nc1ccc(cc1)OC)OCC(=O)NO</chem> | 147.00  | 6.833 | 4 |
| 104 | <chem>CC[C@H](C)[C@H]([N+H3])C(=O)N1Cc2cc(ccc2C[C@H]1C(=O)Nc1ccc(cc1)OC)OCC(=O)NO</chem>                       | 1040.00 | 5.983 | 4 |
| 105 | <chem>COc1ccc(cc1)NC(=O)[C@@H]1Cc2ccc(cc2CN1C(=O)C[N+H3])OCC(=O)NO</chem>                                      | 2140.00 | 5.670 | 4 |
| 106 | <chem>COc1ccc(cc1)NC(=O)[C@@H]1Cc2ccc(cc2CN1C(=O)[C@@H]1CCC[N+H2]1)OCC(=O)NO</chem>                            | 481.00  | 6.318 | 4 |
| 107 | <chem>COc1ccc(cc1)NC(=O)[C@@H]1Cc2ccc(cc2CN1C(=O)[C@H](C)[N+H3])OCC(=O)NO</chem>                               | 1280.00 | 5.893 | 4 |
| 108 | <chem>COc1ccc(cc1)NC(=O)[C@@H]1Cc2ccc(cc2CN1C(=O)[C@@H]([N+H3])C(C)C)OCC(=O)NO</chem>                          | 1020.00 | 5.991 | 4 |
| 109 | <chem>COc1ccc(cc1)NC(=O)[C@@H]1Cc2ccc(cc2CN1Cc1ccccc1)OCC(=O)NO</chem>                                         | 1920.00 | 5.717 | 4 |
| 110 | <chem>COc1ccc(cc1)NC(=O)[C@@H]1Cc2ccc(cc2CN1C(=O)[C@@H]([N+H3])CC(C)C)OCC(=O)NO</chem>                         | 675.00  | 6.171 | 4 |
| 111 | <chem>CC[C@H](C)[C@H](NC(=O)CC(C)(C)C(=O)N1Cc2cc(ccc2C[C@H]1C(=O)Nc1ccc(cc1)OC)OCC(=O)NO</chem>                | 146.00  | 6.836 | 5 |

**Table S2** Physical data of intermediate compounds (**I10-I18**)

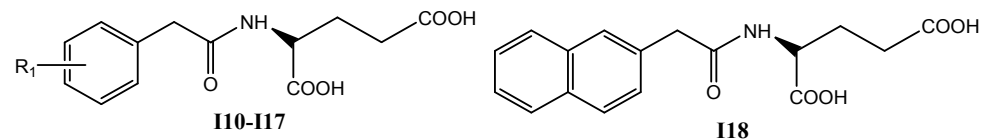

| <b>Compd.</b> | <b>R<sub>1</sub></b> | <b>M.P(°C)</b> | <b>% Yield</b> | <b>Mol. Formula</b>                                             | <b>Mol.wt.</b> |
|---------------|----------------------|----------------|----------------|-----------------------------------------------------------------|----------------|
| <b>I10</b>    | 4-OCH <sub>3</sub>   | 140-142        | 85.71          | C <sub>14</sub> H <sub>17</sub> O <sub>6</sub> N                | 295.29         |
| <b>I11</b>    | 4-Cl                 | 122-124        | 99.04          | C <sub>13</sub> H <sub>14</sub> O <sub>5</sub> NCl              | 299.71         |
| <b>I12</b>    | 4-NO <sub>2</sub>    | 80-82          | 87.49          | C <sub>13</sub> H <sub>14</sub> O <sub>7</sub> N <sub>2</sub>   | 310.26         |
| <b>I13</b>    | 4-Br                 | 136-138        | 97.05          | C <sub>13</sub> H <sub>14</sub> O <sub>5</sub> NBr              | 344.16         |
| <b>I14</b>    | 2-Cl                 | 126-128        | 84.36          | C <sub>13</sub> H <sub>14</sub> O <sub>5</sub> NCl              | 299.71         |
| <b>I15</b>    | 2-Br                 | 150-152        | 93.33          | C <sub>13</sub> H <sub>14</sub> O <sub>5</sub> NBr              | 344.16         |
| <b>I16</b>    | 2-F                  | 134-136        | 83.25          | C <sub>13</sub> H <sub>14</sub> O <sub>5</sub> NF               | 283.25         |
| <b>I17</b>    | 2,4-Cl <sub>2</sub>  | 143-145        | 81.56          | C <sub>13</sub> H <sub>13</sub> O <sub>5</sub> NCl <sub>2</sub> | 334.15         |
| <b>I18</b>    | -                    | 178-180        | 98.2           | C <sub>17</sub> H <sub>17</sub> O <sub>5</sub> N                | 315.32         |

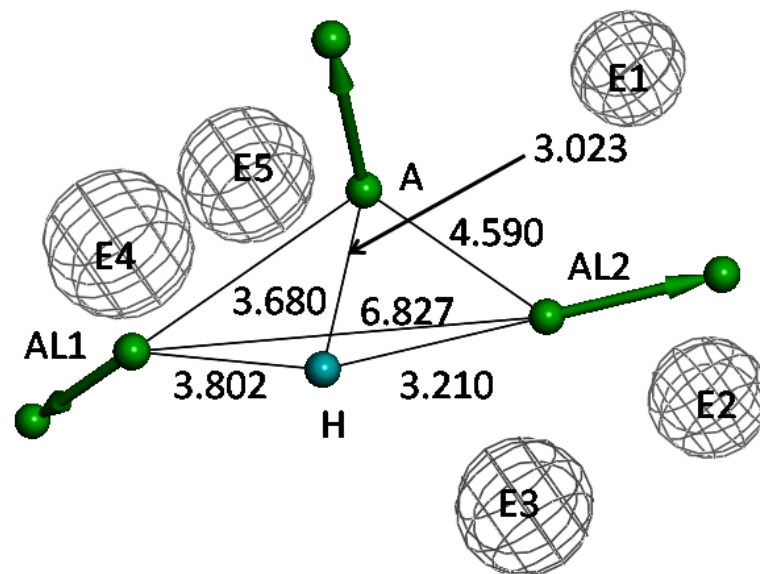

**Figure S1.** Interfeature distance constraints of Hypo2.

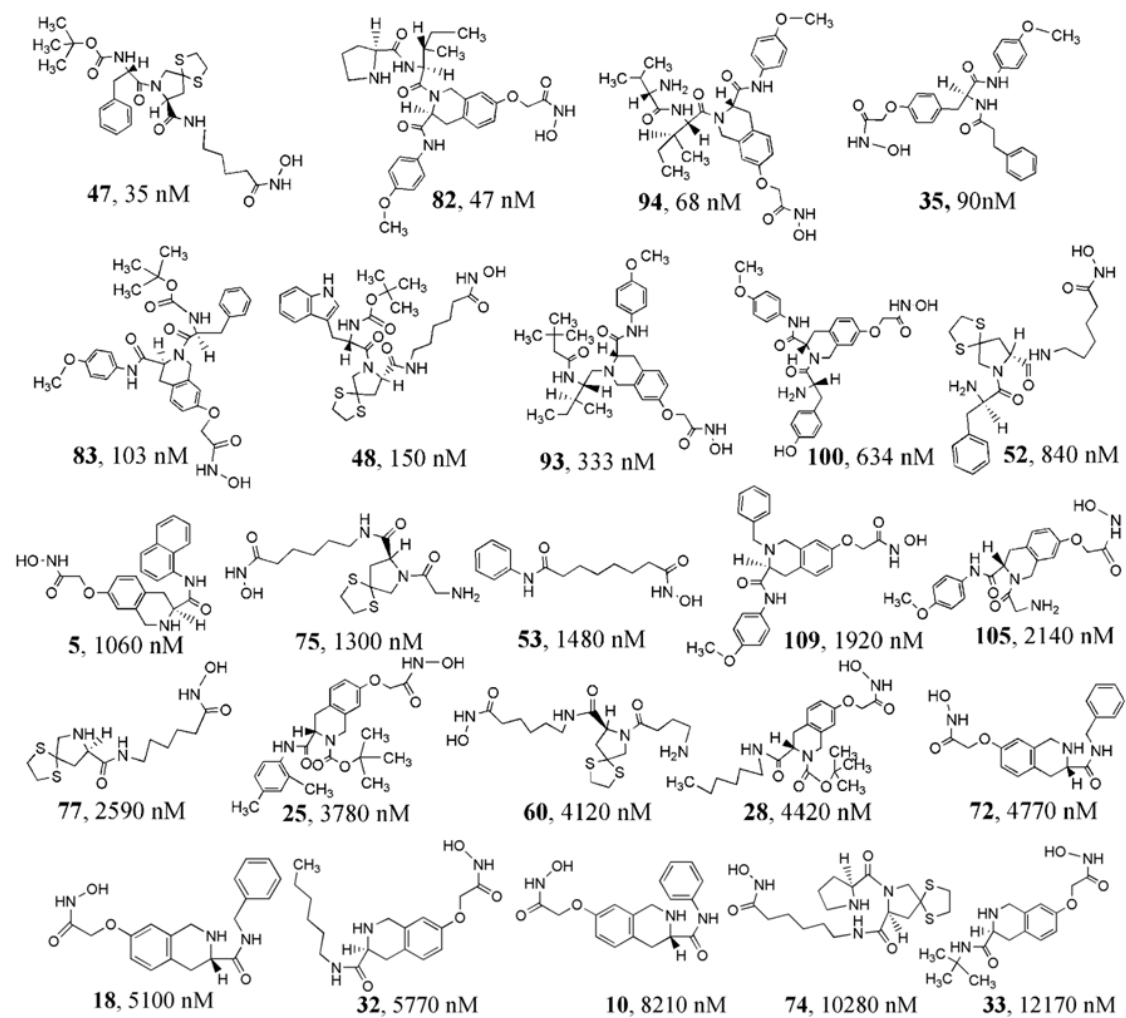

**Figure S2.** Diverse structures used for the development of ligand-based pharmacophore model.

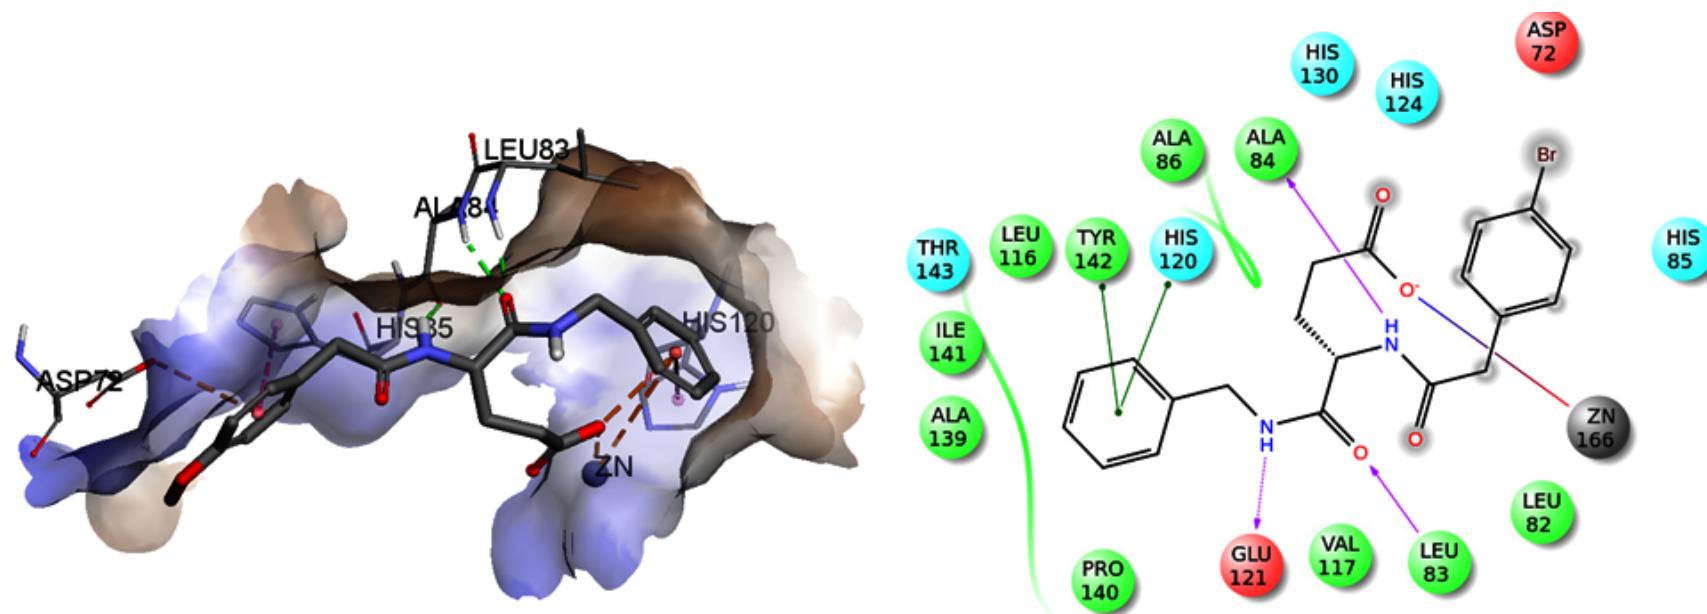

**Figure S3.** Best docking pose of compound **D11**; left side: three-dimensional (3D) representation with hydrophobic contour map, hydrophobic contour map is shown as higher to lower as brown to blue (—); right side: 2D representation of the docking interactions, colours are as follows (● charged (negative), ● charged (positive), ● hydrophobic, ● metal, ● polar, → hydrogen bond (backbone), ● pi-pi interaction, — salt bridge, ● solvent exposure)



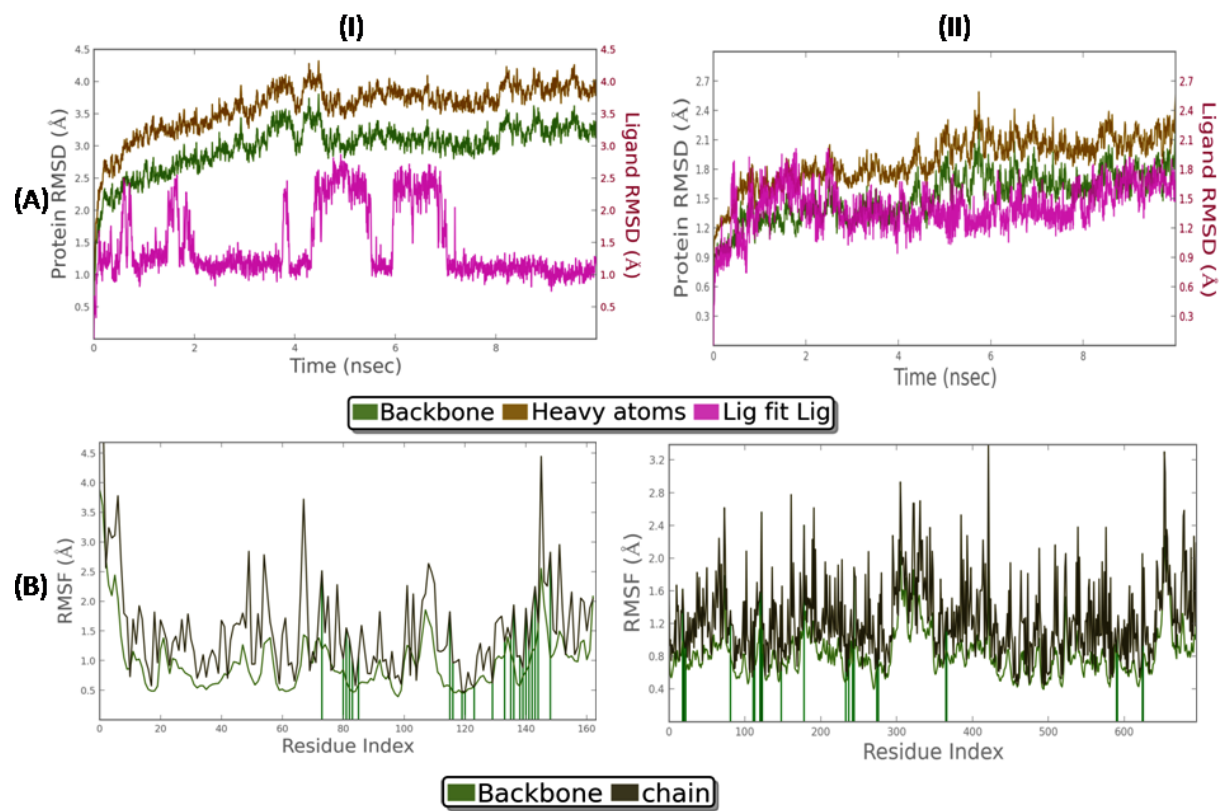

**Figure S4** (A) Root mean square deviation (RMSD) and (B) root mean square fluctuation (RMSF) diagrams of (I) MMP-2: Cpd. **D33** (PDB:1HOV) and (II) HDAC-8: Cpd. **D33** (PDB:1VKG) complexes.

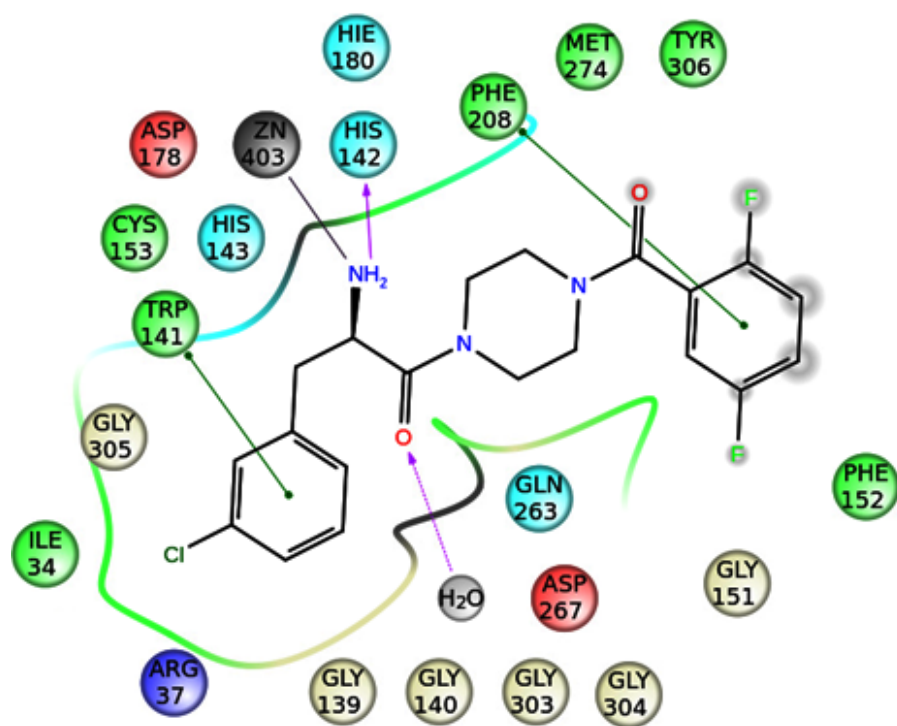

**Binding interactions in PDB:3SFF**

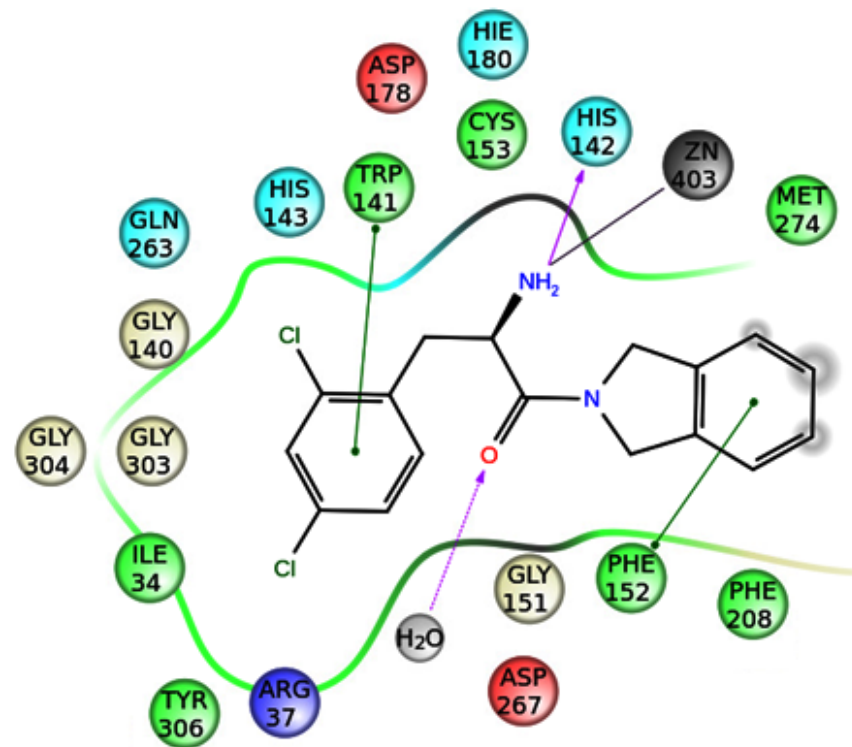

**Binding interactions in PDB:3SFH**

**Figure S5** Binding interactions of the selective HDAC-8 inhibitors in complex with HDAC-8 (PDB IDs: 3SFF and 3SFH)<sup>6</sup>.

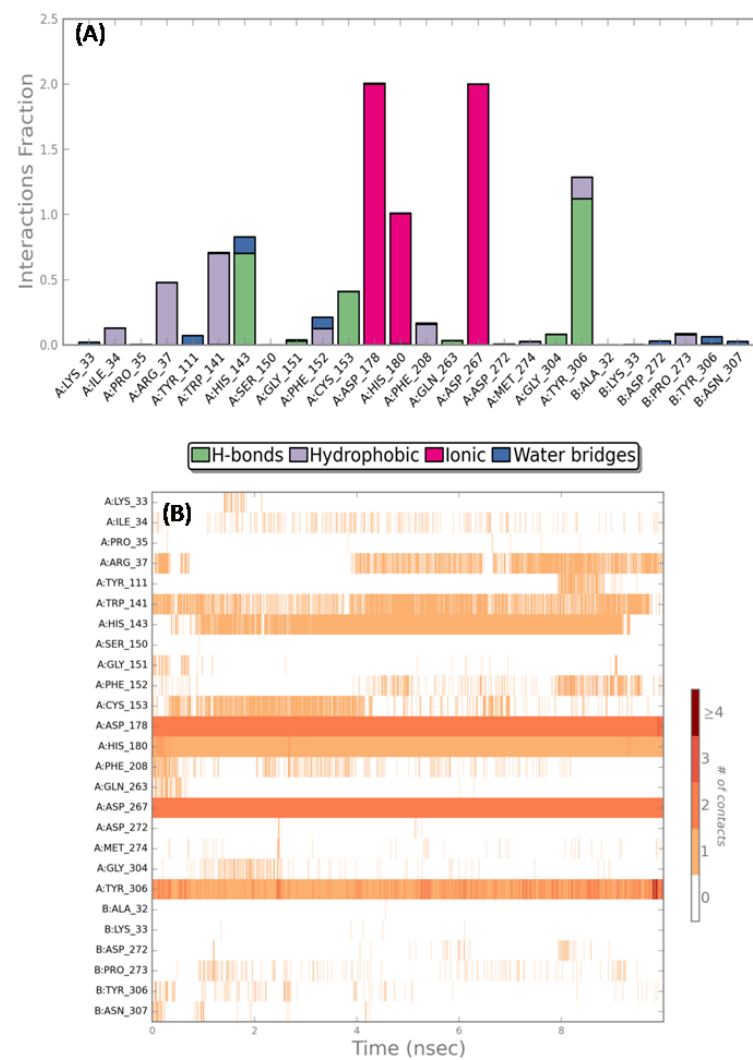

**Figure S6** (A) The histogram interaction diagrams of HDAC-8:D33 complex. (B) Timeline interaction diagram of 10 ns MD simulation run of HDAC-8:D33 complex.

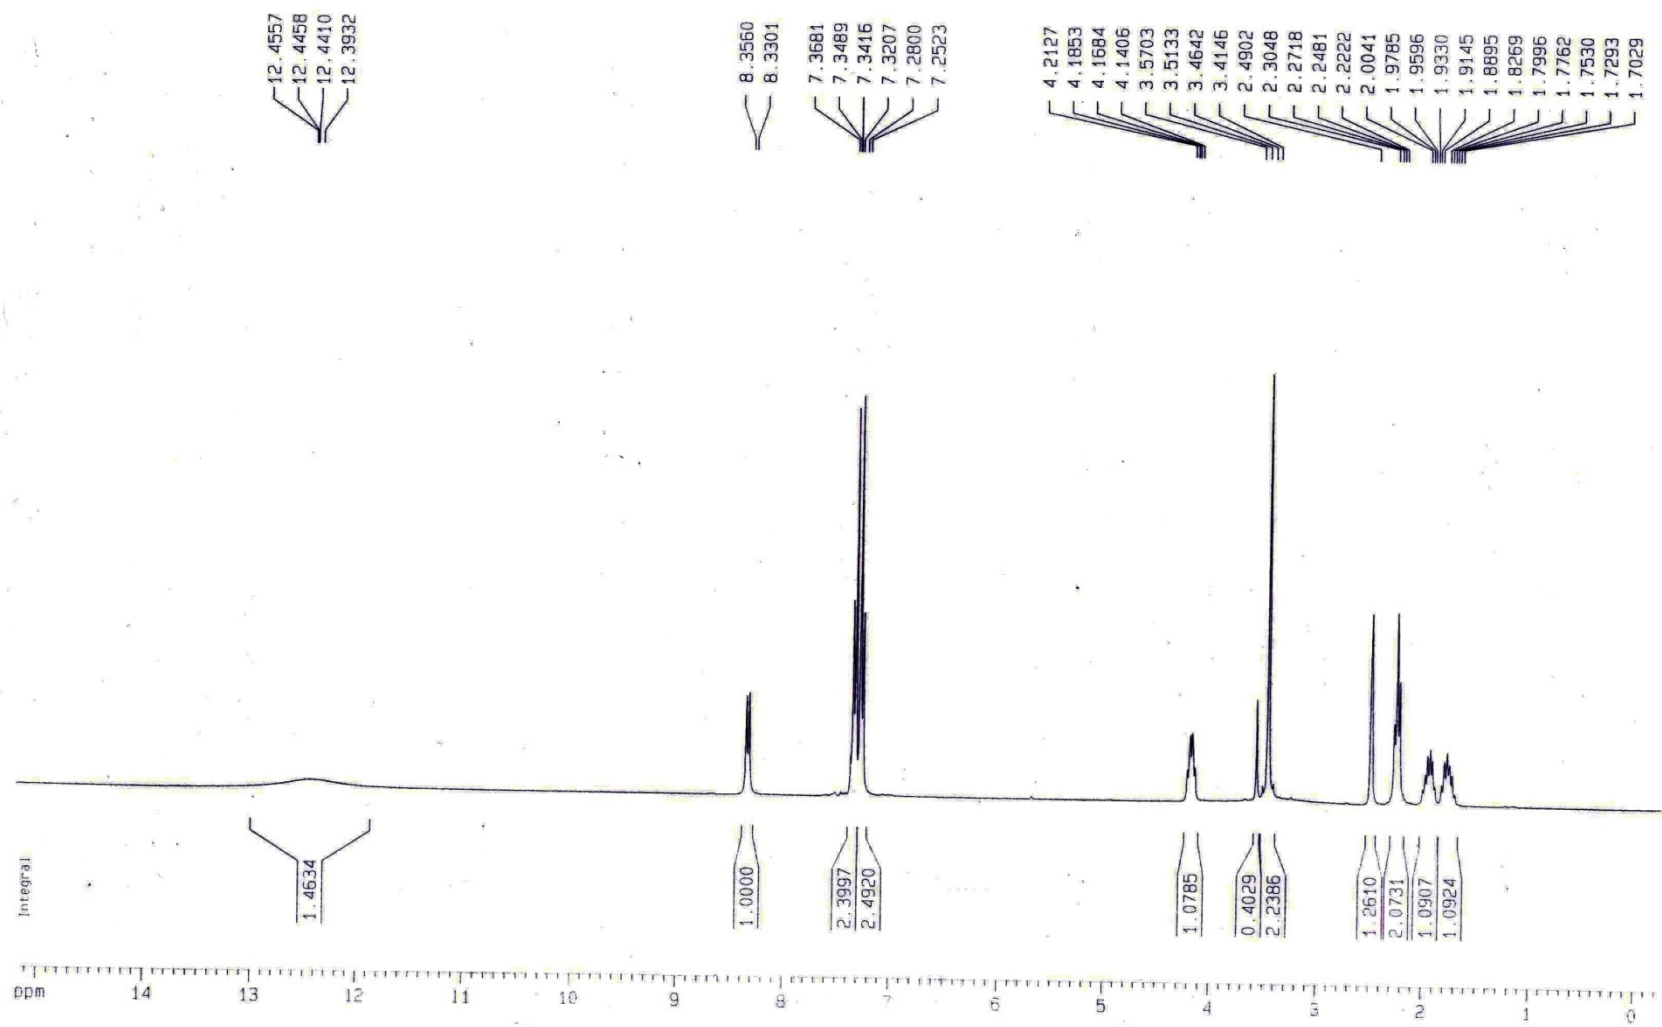

Figure S7 <sup>1</sup>H NMR spectra of I10

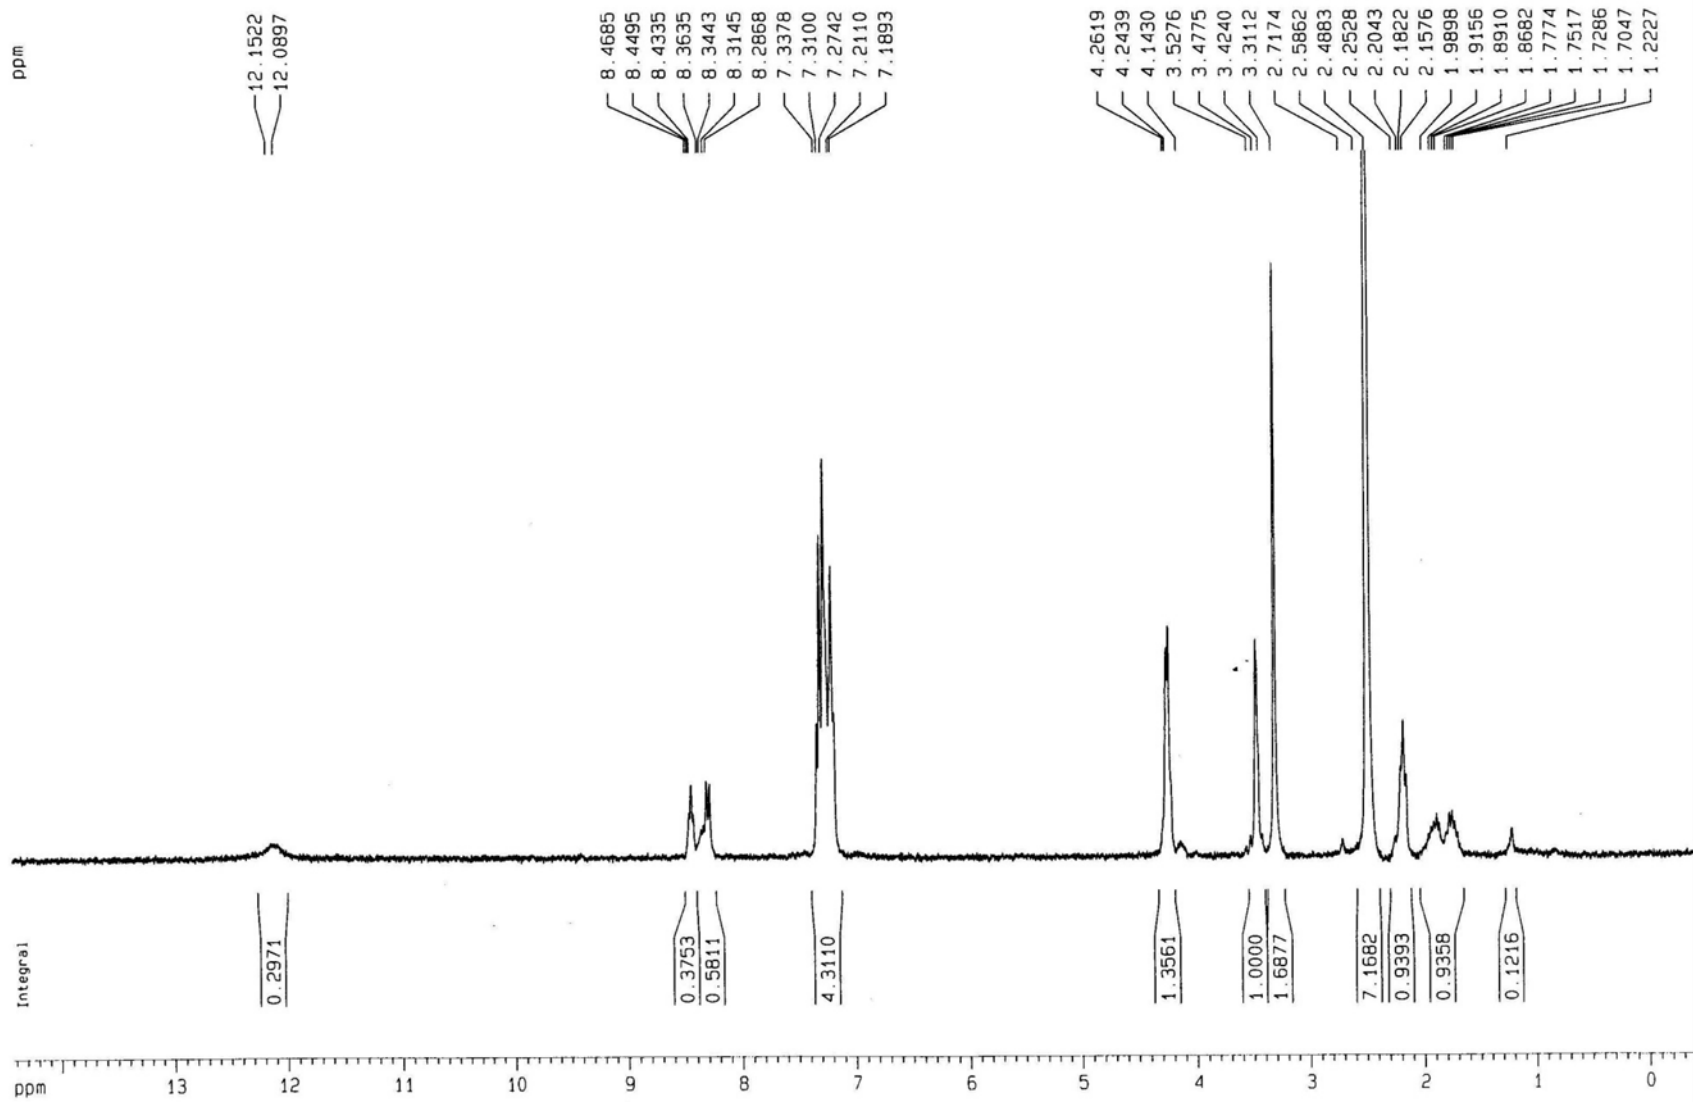

Figure S8  $^1\text{H}$  NMR spectra of D1

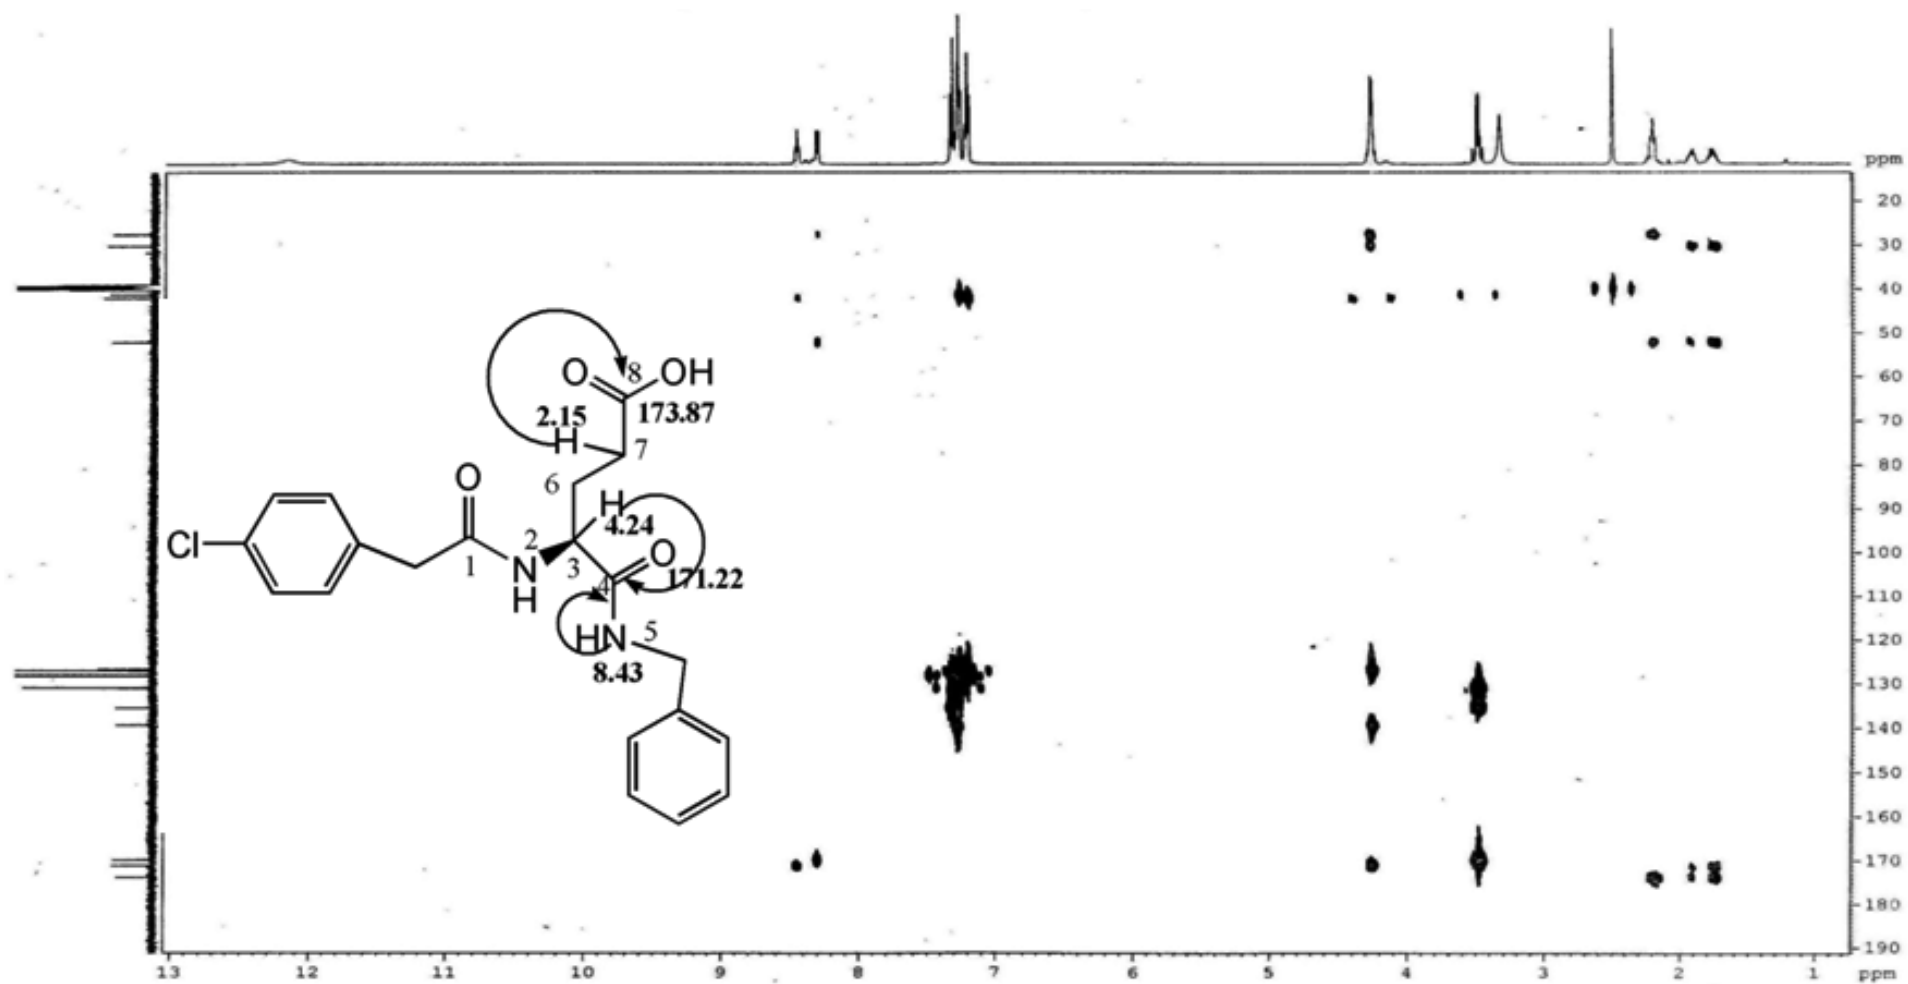

Figure S9a. HMBC spectrum of D1

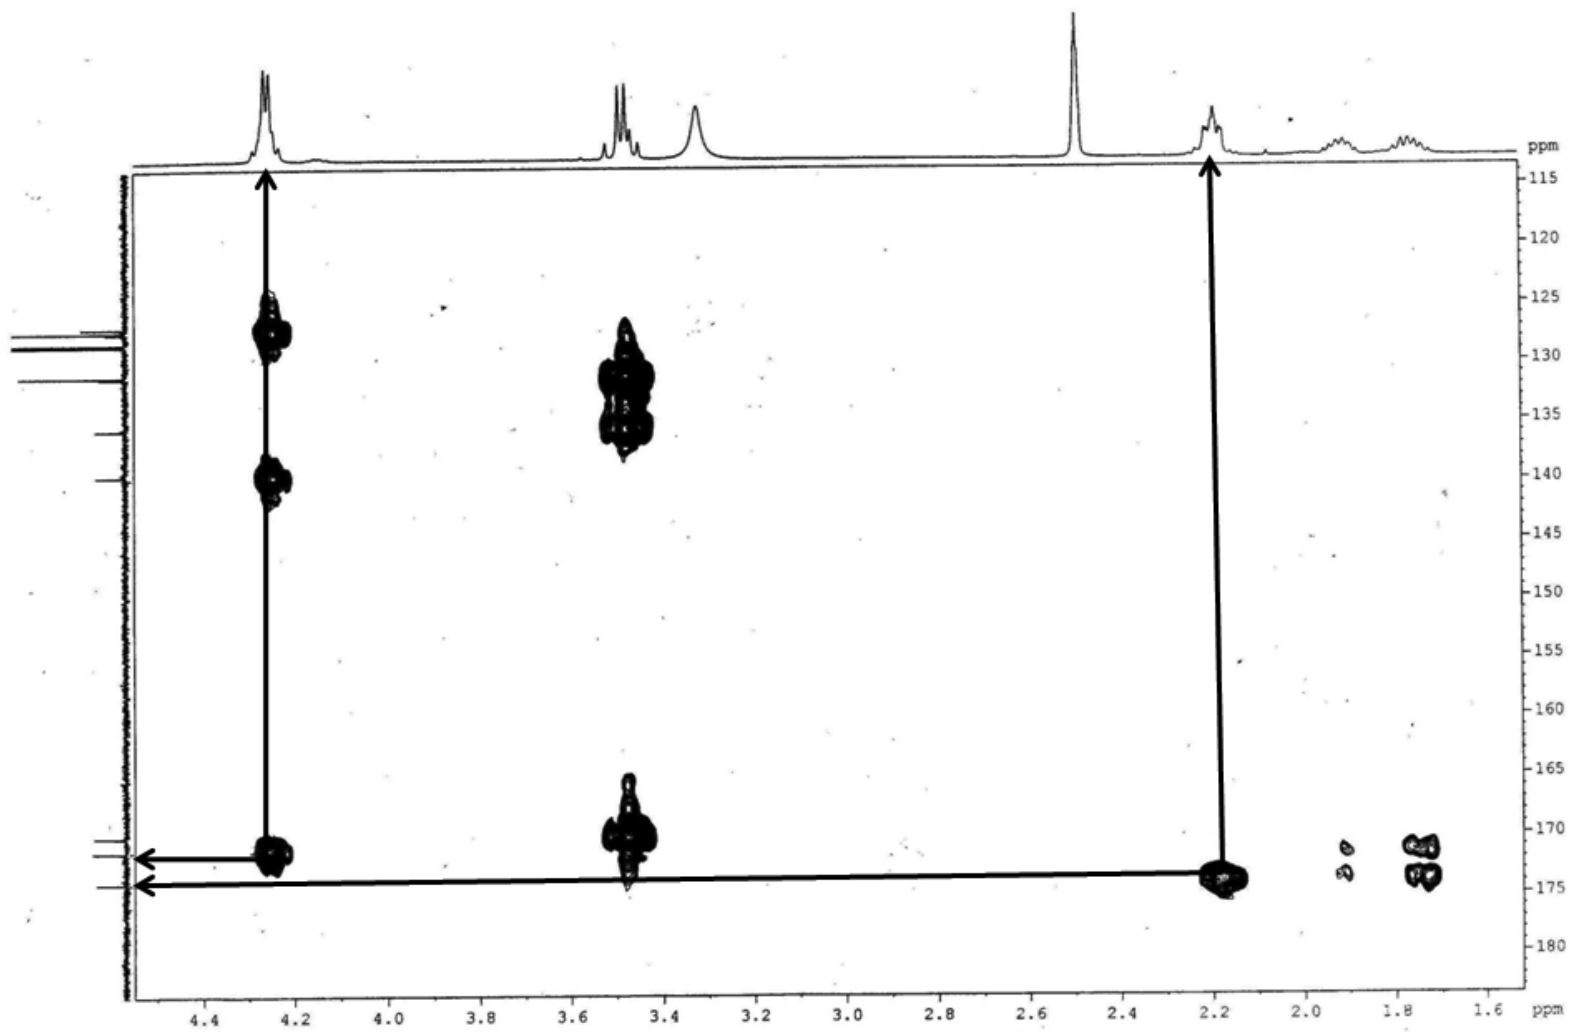

Figure S9b. HMBC spectrum of D1 (Magnified)

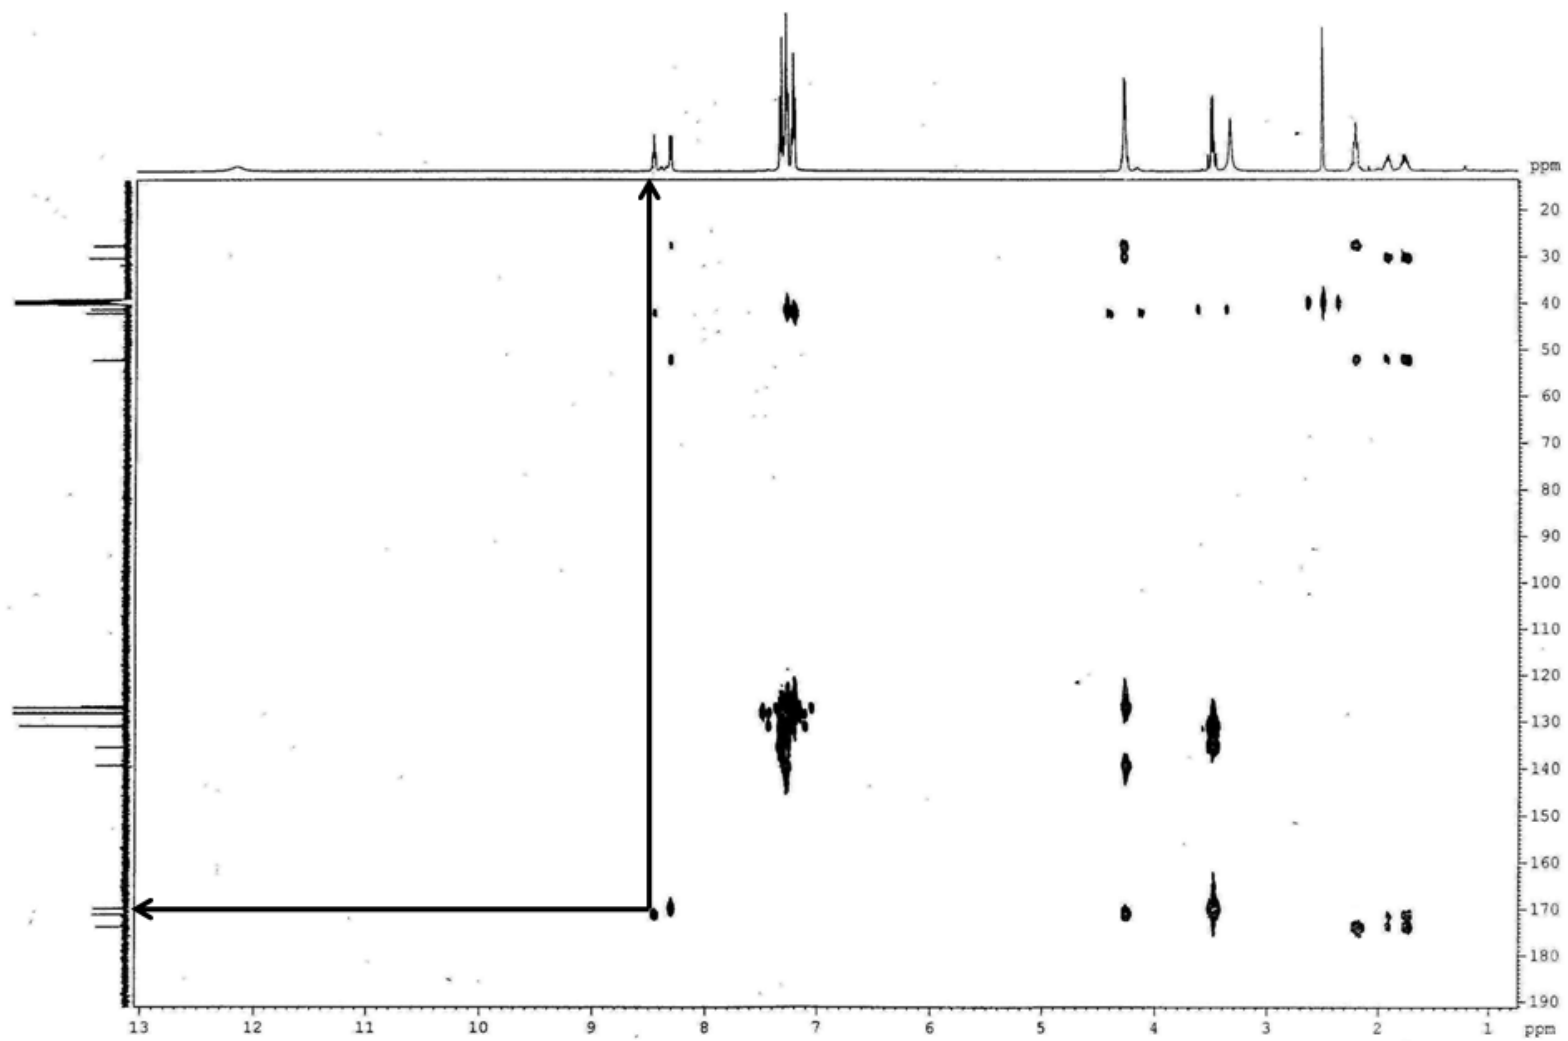

Figure S9c. HMBC spectrum of D1 (Magnified)



## Text S1: Development and validation of ligand- and structure-based pharmacophore models for HDAC-8

### 1. Ligand based pharmacophore mapping of HDAC-8 inhibitors

Experimentally reported HDAC-8 inhibitors (n=111)<sup>1-5</sup> (Table S1) were used for the development and validation of ligand-based pharmacophore model. The structures of these inhibitors were prepared by *Prepare ligand for QSAR* tool of Discovery Studio (DS)<sup>7</sup>, where the duplicate structures were removed, pH of these molecules was set to 7.4. The structures were minimized by Smart Minimizer algorithm (Max steps: 10000, RMS gradient: 0.01) applying CHARMM as the forcefield and *Distance dependent dielectric* as the implicit solvent model. A training set (n<sub>Tr</sub> = 24) (Figure S2) was for Hypogen model development<sup>8</sup> and the remaining compounds (n<sub>TS</sub> = 87) were used as the test set. The feature mapping technique was used for initial selection of the features. After optimizations, the final model was developed with hydrogen bond acceptor (Max: 2, Min: 0), hydrophobic (Max: 3, Min:0), ring aromatic (Max: 2, Min:0), hydrophobic aromatic (Max:2, Min:0) and zinc binding feature (Max:1, Min:1). The uncertainty value and minimum interfeature distance were optimized at 1.5 and 2.5 respectively. Ten hypotheses were developed by Hypogen of Discovery Studio (DS)<sup>7</sup> with fixed, null and configuration costs of 74.61, 289.04 and 16.68 respectively. Important statistical qualities of these models (LigPharm1-10) are listed in Table TS1.

**Table TS1.** Statistical results of Hypogen models.

| Model No.         | Total Cost   | Cost diff <sup>a</sup> | RMSD <sup>b</sup> | Error cost   | Correlation  | Features <sup>c</sup>   |
|-------------------|--------------|------------------------|-------------------|--------------|--------------|-------------------------|
| <b>LigPharm01</b> | <b>99.38</b> | <b>189.66</b>          | <b>1.432</b>      | <b>81.41</b> | <b>0.945</b> | <b>AH<sub>Ar</sub>Z</b> |
| LigPharm 02       | 102.77       | 186.27                 | 1.524             | 84.69        | 0.938        | ARZ                     |
| LigPharm 03       | 105.4        | 183.64                 | 1.595             | 87.33        | 0.932        | ARZ                     |
| LigPharm 04       | 105.45       | 183.59                 | 1.608             | 87.16        | 0.935        | ARZ                     |
| LigPharm 05       | 105.57       | 183.47                 | 1.597             | 87.41        | 0.932        | AH <sub>Ar</sub> Z      |
| LigPharm 06       | 113.63       | 175.41                 | 1.801             | 97.74        | 0.912        | HRZ                     |
| LigPharm 07       | 113.91       | 175.13                 | 1.809             | 96.07        | 0.911        | HRZ                     |
| LigPharm 08       | 114.05       | 174.99                 | 1.808             | 96.05        | 0.911        | AHZ                     |
| LigPharm 09       | 115.47       | 173.57                 | 1.845             | 97.66        | 0.908        | AHZ                     |
| LigPharm 10       | 115.71       | 173.33                 | 1.848             | 97.78        | 0.907        | AHZ                     |

<sup>a</sup>Cost difference, <sup>b</sup>Root mean square deviation, <sup>c</sup>A: hydrogen bond acceptor, H<sub>Ar</sub>: hydrogen bond acceptor aromatic, H: hydrophobic, R: ring aromatic, Z: zinc binding feature

The LigPharm01 model was developed with the most promising statistical results (correlation of 0.945, RMSD of 1.432 and cost difference of 189.66)<sup>9</sup> and it contained three pharmacophore features – hydrogen bond acceptor (A), hydrophobic aromatic (H<sub>Ar</sub>) and zinc

binding (Z). The Fischer randomization test<sup>9</sup> was performed with 95% confidence interval and is repeated in Table TS2. The average correlation coefficient (0.783) and total cost values (163.65) of the randomized models (Table TS2) indicate that the current model followed the null hypothesis and was not developed by chance.

**Table TS2.** Results of Fischer randomization test of LigPharm01.

| Model      | Correlation | Cost    |
|------------|-------------|---------|
| LigPharm01 | 0.946       | 99.381  |
| Random1    | 0.848       | 140.568 |
| Random2    | 0.828       | 145.658 |
| Random3    | 0.686       | 197.752 |
| Random4    | 0.871       | 143.372 |
| Random5    | 0.617       | 215.481 |
| Random6    | 0.913       | 116.184 |
| Random7    | 0.845       | 140.267 |
| Random8    | 0.825       | 149.926 |
| Random9    | 0.808       | 153.488 |
| Random10   | 0.734       | 180.597 |
| Random11   | 0.742       | 180.609 |
| Random12   | 0.693       | 193.529 |
| Random13   | 0.751       | 173.392 |
| Random14   | 0.674       | 199.867 |
| Random15   | 0.797       | 162.681 |
| Random16   | 0.841       | 142.195 |
| Random17   | 0.768       | 173.631 |
| Random18   | 0.831       | 148.517 |
| Random19   | 0.811       | 151.582 |
| Average    | 0.783       | 163.647 |

The LigPharm01 was used to screen the test set molecules ( $n_{Ts} = 87$ ) and the correlation coefficient ( $R^2$ ) between the observed and the predicted activities was found to be 0.642 which was higher than other pharmacophore models (LigPharm02-10). Five compounds (Cpds. **37**, **46**, **56**, **78** and **81**) showed high error values ( $>7.0$ ) and thus, treated as outliers. After removing these compounds, the correlation ( $R^2$ ) was increased to 0.706 ( $R^2_{Pred} = 0.502$ ). Furthermore, the predictability of this model was found to be the higher than other developed hypotheses (LigPharm02-10). Therefore, the LigPharm01 was selected as the best pharmacophore model for HDAC-8 inhibition. The activity plot, the mappings of the most (Cpd. **49**) and the least (Cpd. **33**) active compounds in the dataset are depicted in Figure TS1.

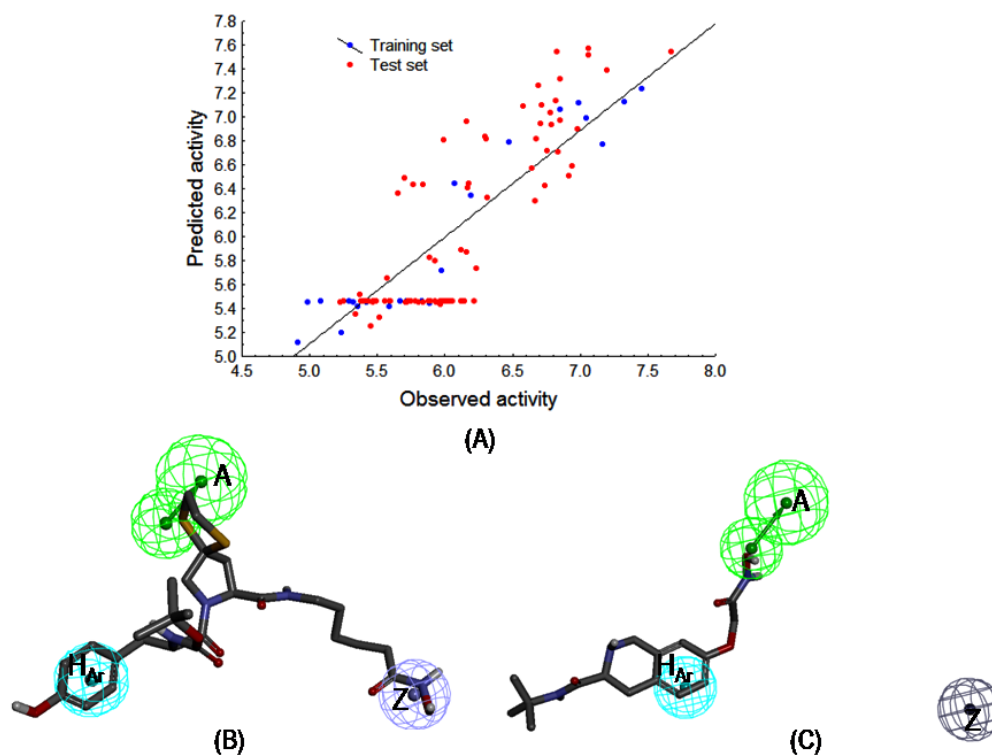

**Figure TS1.** (A) The observed vs predicted activity plot of LigPharm01, (B) mapping of the best active compound (Cpd. 33) in LigPharm01, (C) mapping of the least active compound (Cpd. 49) in LigPharm01.

## 2. Structure based pharmacophore mapping of HDAC-8 inhibitors

Out of different X-ray crystal structures of HDAC-8 proteins available in the Protein Data Bank<sup>10</sup> (accessed on 10<sup>th</sup> May, 2014), 18 structures with resolution less than 2.5 Å were considered for the structure-based pharmacophore model development. These protein structures were prepared by *Prepare Protein* tool of DS<sup>7</sup>. The prepared proteins were subjected to the structure-based pharmacophore generation by the help of *Receptor ligand pharmacophore generation* tool in DS<sup>7</sup>. For each protein structure, 10 hypotheses were generated and were ranked on the basis of the selectivity score<sup>9</sup>. All developed pharmacophore models were validated by a decoy set ( $n_{ds} = 10,748$ ) collected from Directory of Useful Decoys-Enhanced (DUD-E) dataset (<http://dude.docking.org>, accessed on 12<sup>th</sup> June, 2014)<sup>11</sup>. The decoy set contained 234 active and 10,514 inactive molecules. The *Receptor ligand pharmacophore generation* tool is unable to generate zinc binding feature like Hypogen tool. Zinc binding feature (Z) is not only one of the most crucial features for HDAC-8 inhibition but its presence in the pharmacophore model considerably reduces the number of false positives and improved validation statistics for each hypothesis. Therefore, after developing the structure-based hypotheses, models with zinc binding group associated

features were selected and these features (mostly donor) were replaced with Z features. These models were validated by a decoy set of DUD-E database to select most suitable structure-based pharmacophore model. It was observed that 1VKG protein<sup>12</sup> developed the most promising structure-based pharmacophore comparing with other proteins. Out of ten pharmacophores generated by this protein-ligand complex, four appeared with donor features associated with the zinc binding hydroxamic acid group of the bound ligand [CRA-19156, 5-(4-methyl-benzoylamino)-biphenyl-3,4'-dicarboxylic acid -3- dimethylamide-4'-hydroxamide]. After modification of the pharmacophore with Z feature, the decoy set was screened with these models with the help of *Ligand pharmacophore mapping* protocol of DS<sup>7</sup>, setting maximum omitted feature value as 0 (i.e., ligands that fit all pharmacophore features will only be passed). The pharmacophore hits were analyzed by different statistical parameters, like selectivity score, sensitivity, specificity, accuracy and 'goodness of hit' (GH) score<sup>13</sup>. The statistical results of the structure-based pharmacophore models are shown in Table TS3.

**Table TS3.** Statistical results of the structure-based pharmacophore models.

| Model No.         | TA         | TI           | TP         | TN    | FP        | FN         | Select <sup>a</sup> | Sn <sup>b</sup> | Sp <sup>c</sup> | Acc <sup>d</sup> | GH <sup>e</sup> | Features    |
|-------------------|------------|--------------|------------|-------|-----------|------------|---------------------|-----------------|-----------------|------------------|-----------------|-------------|
| StrPharm01        | 234        | 10514        | 36         | 10481 | 33        | 198        | 2.474               | 0.154           | 0.997           | 0.978            | 0.429           | ZHHR        |
| <b>StrPharm02</b> | <b>234</b> | <b>10514</b> | <b>115</b> | 10469 | <b>45</b> | <b>119</b> | <b>2.384</b>        | <b>0.491</b>    | <b>0.996</b>    | <b>0.985</b>     | <b>0.659</b>    | <b>ZHRR</b> |
| StrPharm03        | 234        | 10514        | 70         | 10491 | 23        | 164        | 2.245               | 0.299           | 0.997           | 0.982            | 0.639           | ZHRR        |
| StrPharm04        | 234        | 10514        | 123        | 10457 | 57        | 111        | 1.819               | 0.526           | 0.991           | 0.984            | 0.644           | ZHHR        |

<sup>a</sup>Selectivity score, <sup>b</sup>sensitivity, <sup>c</sup>specificity, <sup>d</sup>accuracy, <sup>e</sup>Goodness of hit (GH) score

The models showed the importance of three features - hydrophobic (H), zinc binder (Z) and ring aromatic (R). Except StrPharm01, all hypotheses showed goodness of hit (GH) scores of more than 0.60. However, on the basis of selectivity score, accuracy and GH score, StrPharm02 hypothesis appeared to be the most promising pharmacophore model. It showed accuracy of 0.985 and GH score of 0.659. Therefore, this pharmacophore model was selected as the best structure-based pharmacophore model. The interfeature distance constraints of StrPharm02 are shown in Figure 1 (main text).

This pharmacophore model suggests that minimum two aromatic rings a zinc binding group are required for the HDAC-8 inhibition. To understand the importance of the features of this hypothesis, each feature was removed and the decoy set validation was repeated. It was found that removal of R<sub>1</sub> reduced the GH score to 0.510 whereas deletion of R<sub>2</sub> reduced the value to 0.527. Therefore, both these aromatic features are equally important. Deletion of Z feature completely abolished the selectivity of the pharmacophore and reduced the GH score to

0.084. However, removal of H feature had minimum effect on the GH score as the modified score was 0.600. Therefore, it may be inferred that the H is the least and Z is the most important pharmacophore feature of StrPharm02 model.

### **Text S2: Spectral analyses data of the synthesized molecules**

#### **4(S)-5-[(2-methylpropyl)amino]-4-(2-(4-methoxyphenyl)acetamido)-5-oxopentanoic acid (D2)**

Yield: 58.3%. MP 138-140°C. MS (ESI Postive) m/z [M+Na<sup>+</sup>] 373.21. <sup>1</sup>H NMR (DMSO-d<sub>6</sub>, 300 MHz, ppm) δ 12.09 (s, 1H, COOH), δ 10.14 (s, 1H, CONH), δ 8.40 (d, 1H, CONH, J=8.09), δ 6.85 (m, 5H, Benzene), δ 4.24 (m, 1H, CH), δ 3.68 (s, 3H, OCH<sub>3</sub>), δ 3.56 (s, 2H, CH<sub>2</sub>), δ 2.84 (m, 2H, CH<sub>2</sub>), δ 2.20 (m, 2H, CH<sub>2</sub>), δ 1.80 and 1.68 (m, 2H, CH<sub>2</sub>), δ 1.63 (m, H, CH) δ 0.79 (m, 6H, 2CH<sub>3</sub>). IR (KBr, cm<sup>-1</sup>): 3320 (N-H str of CONH), 3054 (aromatic =C-H str), 2935 (assym. aliphatic -C-H str), 2895 (sym. aliphatic -C-H str), 1724 (C=O str COOH), 1654 (C=O str of CONH), 1529 (N-H deformation), 1443 (aliphatic -C-H deformation), 1388, 1224 (C-O str and O-H bending of COOH).

#### **4(S)-5-(Butylamino)-4-(2-(4-chlorophenyl)acetamido)-5-oxopentanoic acid (D3)**

Yield: 37.8%. MP 138-140 °C. MS (ESI): 377.20 (M+Na). <sup>1</sup>H NMR (300 MHz, DMSO-D<sub>6</sub>, δ ppm): δ 12.07 (s, 1H, COOH), δ 8.43 (m, 1H, CONH), δ 8.28 (d, 1H, CONH, J=8.28), δ 7.18 (m, 5H, Benzene), δ 4.20 (m, 1H-2, CH), δ 3.55 (s, 2H, CH<sub>2</sub>), δ 3.02 (m, 2H, CH<sub>2</sub>), δ 2.18 (m, 2H, CH<sub>2</sub>), δ 1.81 and 1.65 (m, 2H, CH<sub>2</sub>), δ 1.32 (m, 2H, CH<sub>2</sub>), δ 1.23 (m, 2H, CH<sub>2</sub>), δ 0.84 (m, 3H, CH<sub>3</sub>). IR (KBr, cm<sup>-1</sup>): 3309 (N-H str of CONH), 3063 (aromatic =C-H str), 2942 (assym. aliphatic -C-H str), 2877 (sym. aliphatic -C-H str), 1727 (C=O str COOH), 1647 (C=O str of CONH), 1604 (aromatic C=C str), 1542 (N-H deformation), 1439 (aliphatic -C-H deformation), 1411, 1261 (C-O str and O-H bending of COOH), 966 (O-H out of plane deformation of COOH).

#### **4(S)-5-[(2-methylpropyl)amino]-4-(2-(4-chlorophenyl)acetamido)-5-oxopentanoic acid (D4)**

Yield: 42.7%. MP 148-150°C. MS (ESI): 377.18 (M+Na<sup>+</sup>), <sup>1</sup>H NMR (300 MHz, DMSO-D<sub>6</sub>, δ ppm): δ 12.08 (s, 1H, COOH), δ 8.43 (m, 1H, CONH), δ 8.28 (d, 1H, CONH, J=8.24), δ 7.16 (m, 5H, Benzene), δ 4.22 (m, 1H-2, CH), δ 3.57 (s, 2H, CH<sub>2</sub>), δ 2.82 (m, 2H, CH<sub>2</sub>), δ 2.19 (m, 2H, CH<sub>2</sub>), δ 1.85 and 1.68 (m, 2H, CH<sub>2</sub>), δ 1.63 (m, 1H, CH) δ 0.79 (d, 6H, 2CH<sub>3</sub>). IR (KBr, cm<sup>-1</sup>): 3309 (N-H str of CONH), 3063 (aromatic =C-H str), 2943 (assym. aliphatic -C-

H str), 2878 (sym. aliphatic -C-H str), 1723 (C=O str COOH), 1649 (C=O str of CONH), 1610 (aromatic C=C str), 1542 (N-H deformation), 1436 (aliphatic -C-H deformation), 1412, 1262 (C-O str and O-H bending of COOH), 968 (O-H out of plane deformation of COOH).

**4(S)-5-(Benzylamino)-4-(2-(4-chlorophenyl)acetamido)-5-oxopentanoic acid (D5)**

Yield: 49.5%. MP 158-160°C. MS (ESI): 411.12 (M+Na<sup>+</sup>), 413.11 (M+Na<sup>+</sup>+2H<sup>+</sup>), 414.12 (M+Na<sup>+</sup>+3H<sup>+</sup>). <sup>1</sup>HNMR(300MHz, DMSO-D<sub>6</sub>, δ ppm): δ 12.08 (s, 1H, COOH), δ 8.43 (m, 1H, CONH), δ 8.28 (d, 1H, CONH, J=8.31), δ 7.18 (m, 9H, Benzene), δ 4.24 (m, 1H, CH), δ 4.14 (m, 2H, CH<sub>2</sub>), δ 3.42 (s, 2H, CH<sub>2</sub>), δ 2.15 (m, 2H, CH<sub>2</sub>), δ 1.70 (m, 2H-3). IR (KBr, cm<sup>-1</sup>): 3309 (N-H str of CONH), 3063 (aromatic =C-H str), 2942 (assym. aliphatic -C-H str), 2877 (sym. aliphatic -C-H str), 1727 (C=O str COOH), 1647 (C=O str of CONH), 1604 (aromatic C=C str), 1542 (N-H deformation), 1439 (aliphatic -C-H deformation), 1411, 1261 (C-O str and O-H bending of COOH), 966 (O-H out of plane deformation of COOH).

**4(S)-5-(Hexylamino)-4-(2-(4-chlorophenyl)acetamido)-5-oxopentanoic acid (D6)**

Yield: 33.9%. MP 130-132°C. MS (ESI): 405.20 (M+Na<sup>+</sup>). <sup>1</sup>HNMR(300MHz, DMSO-D<sub>6</sub>, δ ppm): δ 12.07 (s, 1H, COOH), δ 8.42 (m, 1H, CONH), δ 8.28 (d, 1H, CONH, J=8.35), δ 7.16 (m, 9H, Benzene), δ 4.14 (m, 1H-2, CH), δ 3.32 (s, 2H, CH<sub>2</sub>), δ 2.93 (m, 2H, CH<sub>2</sub>), δ 2.07 (m, 2H-4, CH<sub>2</sub>), δ 1.81 and 1.67 (m, 2H-3, CH<sub>2</sub>), δ 1.31 (m, 2H, CH<sub>2</sub>), δ 1.21 (m, 6H, CH<sub>2</sub>CH<sub>2</sub>CH<sub>2</sub>), δ 0.81 (m, 3H-6'', CH<sub>3</sub>). IR (KBr, cm<sup>-1</sup>): 3309 (N-H str of CONH), 3060 (aromatic =C-H str), 2941 (assym. aliphatic -C-H str), 2883 (sym. aliphatic -C-H str), 1727 (C=O str COOH), 1646 (C=O str of CONH), 1604 (aromatic C=C str), 1536 (N-H deformation), 1439 (aliphatic -C-H deformation), 1416, 1258 (C-O str and O-H bending of COOH), 976 (O-H out of plane deformation of COOH).

**4(S)-5-(Pentylamino)-4-(2-(4-nitrophenyl) acetamido)-5-oxopentanoic acid (D7)**

Yield: 33.9%. MP 164-166°C. MS (ESI): 380.19 (M+H<sup>+</sup>), 402.17 (M+Na<sup>+</sup>), 403.17 (M+Na<sup>+</sup>+H<sup>+</sup>), 418.14 (M+K<sup>+</sup>). <sup>1</sup>HNMR (300MHz, DMSO-D<sub>6</sub>, δ ppm): δ 12.32 (s, 1H, COOH), δ 8.20 (d, 1H, CONH-2, J=8.04), δ 8.13 (m, 2H, Benzene), δ 7.77 (m, 1H, CONH), δ 7.50 (m, 2H, Benzene), δ 4.15 (m, 1H, CH), δ 3.64 (m, 2H, CH<sub>2</sub>), δ 2.97 (m, 2H, CH<sub>2</sub>), δ 2.13 (m, 2H, CH<sub>2</sub>), δ 1.71 (m, 2H, CH<sub>2</sub>), δ 1.32 (m, 2H, CH<sub>2</sub>), δ 1.24 (m, 2H, CH<sub>2</sub>), δ 1.15 (m, 2H, CH<sub>2</sub>), δ 0.79 (m, 3H, CH<sub>3</sub>). IR (KBr, cm<sup>-1</sup>): 3313 (N-H str of CONH), 3108 (aromatic =C-H str), 2953 (assym. aliphatic -CH<sub>3</sub> str), 2930 (assym. aliphatic -CH<sub>2</sub> str), 2870 (sym. aliphatic -CH<sub>3</sub> str), 1724 (C=O str COOH), 1650 (C=O str of CONH), 1606 (aromatic

C=C str), 1551 (N-H deformation of CONH), 1518 (aromatic C-NO<sub>2</sub> str), 1498 (aliphatic -CH<sub>2</sub> deformation), 1442 (aliphatic -CH<sub>3</sub> deformation), 1414,1230 (C-O str and O-H bending of COOH), 1019 (aromatic =C-H in plane deformation), 937 (O-H out of plane deformation of COOH).

**4(S)-5-[(2, 2-dimethylethyl) amino]-4-(2-(4-nitrophenyl) acetamido)-5-oxopentanoic acid (D8)**

Yield: 32.6%. MP 160-162°C. MS (ESI): 388.20 (M+Na<sup>+</sup>). <sup>1</sup>HNMR (300MHz, DMSO-D<sub>6</sub>, δ ppm): MS (ESI): 380.19 (M+H<sup>+</sup>), 402.17 (M+Na<sup>+</sup>), 403.17 (M+Na<sup>+</sup>+H<sup>+</sup>), 418.14 (M+K<sup>+</sup>). <sup>1</sup>HNMR (300MHz, DMSO-D<sub>6</sub>, δ ppm): δ 12.32 (s, 1H, COOH), δ 8.21 (d, 1H, CONH-2, J=8.04), δ 8.13 (m, 2H, Benzene), δ 7.68 (m, 1H, CONH), δ 7.53 (m, 2H, Benzene), δ 4.16 (m, 1H, CH), δ 3.64 (m, 2H, CH<sub>2</sub>), δ 2.18 (m, 2H, CH<sub>2</sub>), δ 1.74 (m, 2H, CH<sub>2</sub>), δ 1.35 (m, 9H, 3CH<sub>3</sub>). IR (KBr, cm<sup>-1</sup>): 3310 (N-H str of CONH), 3107 (aromatic =C-H str), 2954 (assym. aliphatic -CH<sub>3</sub> str), 2940 (assym. aliphatic -CH<sub>2</sub> str), 2874 (sym. aliphatic -CH<sub>3</sub> str), 1712 (C=O str COOH), 1655 (C=O str of CONH), 1620 (aromatic C=C str), 1552 (N-H deformation of CONH), 1511 (aromatic C-NO<sub>2</sub> str), 1441 (aliphatic -CH<sub>3</sub> deformation), 1414,1230 (C-O str and O-H bending of COOH), 937 (O-H out of plane deformation of COOH).

**4(S)-5-[(1-Methylethyl)amino]-4-(2-(4-bromophenyl) acetamido)-5-oxopentanoic acid (D9)**

Yield: 32.3%. MP 184-186°C. MS (ESI): 386.21 (M+Na<sup>+</sup>H<sup>+</sup>), 408.10 (M+Na<sup>+</sup>+2H<sup>+</sup>). <sup>1</sup>HNMR (300MHz, DMSO-D<sub>6</sub>, δ ppm): δ 12.10 (s, 1H, COOH), δ 8.20 (d, 1H, CONH, J=8.20), δ 7.75 (m, 1H, CONH), δ 7.44 (m, 2H, Benzene), δ 7.18 (m, 2H, Benzene), 4.19 (m, 1H, CH), δ 3.90 (m, 1H, CH), δ 3.48 (s, 2H, CH<sub>2</sub>), δ 2.14 (m, 2H, CH<sub>2</sub>), δ 1.73 (m, 2H-3, CH<sub>2</sub>), δ 0.98 (d, 6H, 2CH<sub>3</sub>). IR (KBr, cm<sup>-1</sup>): 3292 (N-H str of CONH), 3097 (aromatic =C-H str), 2955 (assym. aliphatic -CH<sub>3</sub> str), 2928 (assym. aliphatic -CH<sub>2</sub> str), 2856 (sym. aliphatic -CH<sub>3</sub> str), 1712 (C=O str COOH), 1634 (C=O str of CONH), 1592 (aromatic C=C str), 1546 (N-H deformation of CONH), 1488 (aliphatic -CH<sub>2</sub> deformation), 1435 (aliphatic -CH<sub>3</sub> deformation), 1408,1228 (C-O str and O-H bending of COOH), 1071 (aromatic C-Br str), 1013 (aromatic =C-H in plane deformation), 949 (O-H out of plane deformation of COOH).

**4(S)-5-(Pentylamino)-4-(2-(4-bromophenyl) acetamido)-5-oxopentanoic acid (D10)**

Yield: 27.8%. MP 150-152°C. MS (ESI): 436.20 (M+Na). <sup>1</sup>HNMR (300MHz, DMSO-D<sub>6</sub>, δ ppm): δ 12.12 (s, 1H, COOH), δ 8.20 (d, 1H, CONH, J=8.13), δ 7.75 (m, 1H, CONH), δ

7.44-7.47 (m, 2H, Benzene),  $\delta$  7.18-7.21(m, 2H, Benzene),  $\delta$  4.15 (m, 1H, CH),  $\delta$  3.64 (m, 2H, CH<sub>2</sub>),  $\delta$  2.90 (m, 2H, CH<sub>2</sub>),  $\delta$  2.14 (m, 2H, CH<sub>2</sub>),  $\delta$  1.70 (m, 2H, CH<sub>2</sub>),  $\delta$  1.30 (m, 2H, CH<sub>2</sub>),  $\delta$  1.27 (m, 2H, CH<sub>2</sub>),  $\delta$  1.16 (m, 2H, CH<sub>2</sub>),  $\delta$  0.80 (m, 3H, CH<sub>3</sub>). IR (KBr, cm<sup>-1</sup>): 3292 (N-H str of CONH), 3097 (aromatic =C-H str), 2950 (assym. aliphatic -CH<sub>3</sub> str), 2930 (assym. aliphatic -CH<sub>2</sub> str), 2856 (sym. aliphatic -CH<sub>3</sub>str), 1718 (C=O str COOH), 1644 (C=O str of CONH), 1592 (aromatic C=C str), 1546 (N-H deformation of CONH), 1408,1228 (C-O str and O-H bending of COOH), 1076 (aromatic C-Br str), 1010 (aromatic =C-H in plane defromation), 952 (O-H out of plane deformation of COOH).

**4(S)-5-(Benzylamino)-4-(2-(4-bromophenyl) acetamido)-5-oxopentanoic acid (D11)**

Yield: 33.4%. MP 144-146°C. MS (ESI): 456.10 (M+Na),  $\delta$  12.12 (s, 1H, COOH),  $\delta$  8.20 (d, 1H, CONH, J=8.13),  $\delta$  7.78 (m, 1H, CONH),  $\delta$  6.94 (m, 9H, Benzene),  $\delta$  4.24 (m, 1H, CH),  $\delta$  4.14 (m, 2H, CH<sub>2</sub>),  $\delta$  3.42 (s, 2H, CH<sub>2</sub>),  $\delta$  2.15 (m, 2H, CH<sub>2</sub>),  $\delta$  1.70 (m, 2H, CH<sub>2</sub>). IR (KBr, cm<sup>-1</sup>): 3309 (N-Hstr of CONH), 3063 (aromatic =C-H str), 2942 (assym. aliphatic -C-H str), 2877 (sym. aliphatic -C-H str), 1727 (C=O str COOH), 1647 (C=O str of CONH), 1604 (aromatic C=C str), 1542 (N-H deformation), 1439 (aliphatic -C-H deformation), 1411, 1261 (C-O str and O-H bending of COOH), 1076 (aromatic C-Br str).

**4(S)-5-(Hexylamino)-4-(2-(4-bromophenyl) acetamido)-5-oxopentanoic acid (D12)**

Yield: 32.1%. MP 152-154°C. MS (ESI): 451.06 (M+Na<sup>+</sup>H<sup>+</sup>), 452.06 (M+Na<sup>+</sup>+2H<sup>+</sup>). <sup>1</sup>HNMR (300MHz, DMSO-D<sub>6</sub>,  $\delta$  ppm):  $\delta$  12.11-12.24 (s, 1H, COOH),  $\delta$  8.20-8.34 (d, 1H, CONH-2, J=8.13),  $\delta$  7.75 (m, 1H, CONH-1),  $\delta$  7.44 (m, 2H, Benzene),  $\delta$  7.18 (m, 2H, Benzene),  $\delta$  4.14 (m, 1H-2, CH),  $\delta$  3.30 (s, 2H, CH<sub>2</sub>),  $\delta$  2.95 (m, 2H, CH<sub>2</sub>),  $\delta$  2.07 (m, 2H, CH<sub>2</sub>),  $\delta$  1.68 (m, 2H, CH<sub>2</sub>),  $\delta$  1.31 (m, 2H, CH<sub>2</sub>),  $\delta$  1.21 (m, 6H, CH<sub>2</sub>CH<sub>2</sub>CH<sub>2</sub>),  $\delta$  0.81 (m, 3H, CH<sub>3</sub>). IR (KBr, cm<sup>-1</sup>): 3292 (N-H str of CONH), 3097 (aromatic =C-H str), 2955 (assym. aliphatic -CH<sub>3</sub> str), 2928 (assym. aliphatic -CH<sub>2</sub> str), 2856 (sym. aliphatic -CH<sub>3</sub>str), 1712 (C=O str COOH), 1634 (C=O str of CONH), 1592 (aromatic C=C str), 1546 (N-H deformation of CONH), 1488 (aliphatic -CH<sub>2</sub> deformation), 1435 (aliphatic -CH<sub>3</sub> deformation), 1408,1228 (C-O str and O-H bending of COOH), 1071 (aromatic C-Br str), 1013 (aromatic =C-H in plane defromation), 949 (O-H out of plane deformation of COOH).

**4(S)-5-[(2-Methylpropyl)amino]-4-(2-(2-chlorophenyl) acetamido)-5-oxopentanoic acid (D13)**



Yield: 35.6%. MP 188-190°C. MS (ESI): 377.09 (M+Na<sup>+</sup>), 379.09 (M+Na<sup>+</sup>+2H<sup>+</sup>), 399.07 (M+2Na<sup>+</sup>). <sup>1</sup>HNMR (300MHz, DMSO-D<sub>6</sub>, δ ppm): δ 12.11 (s, 1H, COOH), δ 8.20 (d, 1H, CONH, J=8.01), δ 7.86 (m, 1H, CONH), δ 7.23 (m, 4H, Benzene), δ 4.22 (m, 1H, CH), δ 3.57 (s, 2H, CH<sub>2</sub>), δ 2.82 (m, 2H, CH<sub>2</sub>), δ 2.19 (m, 2H, CH<sub>2</sub>), δ 1.63 (m, 2H, CH<sub>2</sub>), δ 0.79, (d, 7H, CH(CH<sub>3</sub>)<sub>2</sub>). IR (KBr, cm<sup>-1</sup>): 3312 (N-H str of CONH), 3235 (O-H str of COOH), 3034 (aromatic =C-H str), 2962 (assym.aliphatic -CH<sub>3</sub> str), 2931 (assym.aliphatic-CH<sub>2</sub> str), 2873 (sym. aliphatic -CH<sub>3</sub>str), 1725 (C=O str COOH), 1650 (C=O str of CONH), 1610 (aromatic C=C str), 1545 (N-H deformation of CONH), 1499 (aliphatic -CH<sub>2</sub> deformation), 1447 (aliphatic -CH<sub>3</sub> deformation), 1414, 1243 (C-O str and O-H bending of COOH), 1387 (aliphatic -CH deformation), 1069 (aromatic C-Cl str), 1018 (aromatic =C-H in plane deformation), 953 (O-H out of plane deformation of COOH).

#### **4(S)-5-(Benzylamino)-4-(2-(2-chlorophenyl) acetamido)-5-oxopentanoic acid (D14)**

Yield: 31.6%. MP 194-196°C. MS (ESI): 411.10 (M+Na<sup>+</sup>), <sup>1</sup>HNMR(300MHz, DMSO-D<sub>6</sub>, δ ppm): δ 12.11 (s, 1H, COOH), δ 8.20 (d, 1H, CONH, J=8.01), δ 7.86 (m, 1H, CONH), δ 7.01 (m, 9H, Benzene), δ 4.21 (m, 1H, CH), δ 4.12 (m, 2H, CH<sub>2</sub>), δ 3.35 (s, 2H, CH<sub>2</sub>), δ 2.05 (m, 2H, CH<sub>2</sub>), δ 1.72 (m, 2H-3). IR (KBr, cm<sup>-1</sup>): 3309 (N-H str of CONH), 3063 (aromatic =C-H str), 2942 (assym. aliphatic -C-H str), 2877 (sym. aliphatic -C-H str), 1727 (C=O str COOH), 1647 (C=O str of CONH), 1604 (aromatic C=C str), 1542 (N-H deformation), 1439 (aliphatic -C-H deformation), 1411, 1261 (C-O str and O-H bending of COOH), 966 (O-H out of plane deformation of COOH).

#### **4(S)-5-[(1-Methylethyl)amino]-4-(2-(2-chlorophenyl) acetamido)-5-oxopentanoic acid (D15)**

Yield: 25.1%. MP 201-210°C. MS (ESI): 363.10 (M+Na<sup>+</sup>), <sup>1</sup>HNMR(300MHz, DMSO-D<sub>6</sub>, δ ppm): δ 12.11 (s, 1H, COOH), δ 8.20 (d, 1H, CONH, J=8.01), δ 7.86 (m, 1H, CONH), δ 7.01 (m, 9H, Benzene), 4.14 (m, 1H, CH), δ 3.92 (m, 1H, CH), δ 3.46 (s, 2H, CH<sub>2</sub>), δ 2.14 (m, 2H, CH<sub>2</sub>), δ 1.71 (m, 2H-3, CH<sub>2</sub>), δ 0.95 (d, 6H, 2CH<sub>3</sub>). IR (KBr, cm<sup>-1</sup>): 3308 (N-Hstr of CONH), 3059 (aromatic =C-H str), 2944 (assym. aliphatic -C-H str), 2878 (sym. aliphatic -C-H str), 1720 (C=O str COOH), 1645 (C=O str of CONH), 1614 (aromatic C=C str), 1540 (N-H deformation), 1436 (aliphatic -C-H deformation), 1410, 1265 (C-O str and O-H bending of COOH), 956 (O-H out of plane deformation of COOH).

#### **4(S)-5-(Pentylamino)-4-(2-(2-chlorophenyl) acetamido)-5-oxopentanoic acid (D16)**

Yield: 34.9%. MP 190-192°C. MS (ESI): 390.20 (M+Na<sup>+</sup>), 368.10 (M+H<sup>+</sup>), <sup>1</sup>HNMR(300MHz, DMSO-D<sub>6</sub>, δ ppm): δ 12.11 (s, 1H, COOH), δ 8.20 (d, 1H, CONH, J=8.01), δ 7.86 (m, 1H, CONH), δ 7.01 (m, 5H, Benzene), δ 4.16 (m, 1H, CH), δ 3.65 (m, 2H, CH<sub>2</sub>), δ 2.94 (m, 2H, CH<sub>2</sub>), δ 2.10 (m, 2H, CH<sub>2</sub>), δ 1.73 (m, 2H, CH<sub>2</sub>), δ 1.32 (m, 2H, CH<sub>2</sub>), δ 1.25 (m, 2H, CH<sub>2</sub>), δ 1.16 (m, 2H, CH<sub>2</sub>), δ 0.85 (m, 3H, CH<sub>3</sub>).IR (KBr, cm<sup>-1</sup>):3308 (N-H str of CONH), 3062 (aromatic =C-H str), 2946 (assym. aliphatic -C-H str), 2875 (sym. aliphatic -C-H str), 1729 (C=O str COOH), 1648 (C=O str of CONH), 1614 (aromatic C=C str), 1545 (N-H deformation), 1434 (aliphatic -C-H deformation), 1421, 1246 (C-O str and O-H bending of COOH), 958 (O-H out of plane deformation of COOH), 806, 750, 696, 651 (aromatic -C-H out of plane deformation).

**4(S)-5-[(1-Methylethyl)amino]-4-(2-(2-bromophenyl) acetamido)-5-oxopentanoic acid (D17)**

Yield: 42.7%. MP 218-220°C. MS (ESI): 408.10 (M+Na<sup>+</sup>). <sup>1</sup>HNMR (300MHz, DMSO-D<sub>6</sub>, δ ppm): δ 12.10 (s, 1H, COOH), δ 8.21 (s, 1H, CONH), δ 7.86 (d, 1H, CONH, J=7.78), δ 7.10 (m, 5H, Benzene), δ 4.19 (m, 1H, CH), δ 3.46 (s, 2H, CH<sub>2</sub>), δ 2.13 (m, 2H, CH<sub>2</sub>), δ 1.71 (m, 2H-3, CH<sub>2</sub>), δ 0.94 (d, 6H, 2CH<sub>3</sub>).IR (KBr, cm<sup>-1</sup>): 3320 (N-H str of CONH), 3287 (O-H str of COOH), 3072 (aromatic =C-H str), 2946 (assym.aliphatic -CH<sub>3</sub> str), 2933 (assym. aliphatic -CH<sub>2</sub> str), 2870 (sym. aliphatic -CH<sub>3</sub> str), 1726 (C=O str COOH), 1658 (C=O str of CONH), 1601 (aromatic C=C str), 1541 (N-H deformation of CONH), 1498 (aliphatic -CH<sub>2</sub> deformation), 1447 (aliphatic -CH<sub>3</sub> deformation), 1414,1245 (C-O str and O-H bending of COOH), 1075 (aromatic C-Br str), 1027 (aromatic =C-H in plane deformation), 947 (O-H out of plane deformation of COOH).

**4(S)-5-[(2-Methylpropyl)amino]-4-(2-(2-bromophenyl) acetamido)-5-oxopentanoic acid (D18)**

Yield: 43.0%. MP 196-198°C. MS (ESI): 422.10 (M+Na<sup>+</sup>). <sup>1</sup>HNMR (300MHz, DMSO-D<sub>6</sub>, δ ppm): δ 12.08 (s, 1H, COOH), δ 8.23 (s, 1H, CONH), δ 7.86 (d, 1H, CONH, J=7.78), δ 6.99 (m, 5H, Benzene), δ 4.16 (m, 1H, CH), δ 3.54 (s, 2H, CH<sub>2</sub>), δ 2.80 (m, 2H, CH<sub>2</sub>), δ 2.10 (m, 2H, CH<sub>2</sub>), δ 1.65 (m, 2H, CH<sub>2</sub>), δ 0.80 (d, 7H, CH(CH<sub>3</sub>)<sub>2</sub>).IR (KBr, cm<sup>-1</sup>): 3314 (N-H str of CONH), 3074 (aromatic =C-H str), 2946 (assym.aliphatic -CH<sub>3</sub> str), 2931 (assym. aliphatic -CH<sub>2</sub> str), 2870 (sym. aliphatic -CH<sub>3</sub>str), 1724 (C=O str COOH), 1659 (C=O str of CONH), 1601 (aromatic C=C str), 1543 (N-H deformation of CONH), 1498 (aliphatic -CH<sub>2</sub>

deformation), 1447 (aliphatic –CH<sub>3</sub> deformation), 1078 (aromatic C-Br str), 1022 (aromatic =C-H in plane deformation), 949 (O-H out of plane deformation of COOH).

**4(S)-5-(Pentylamino)-4-(2-(2-bromophenyl) acetamido)-5-oxopentanoic acid (D19)**

Yield: 41.4%. MP 190-192°C. MS (ESI): 414.1 (M+H<sup>+</sup>). <sup>1</sup>HNMR (300MHz, DMSO-D<sub>6</sub>, δ ppm): δ 12.10 (s, 1H, COOH), δ 8.21 (s, 1H, CONH), δ 7.86 (d, 1H, CONH, J=7.78), δ 7.10 (m, 5H, Benzene), δ 4.14 (m, 1H, CH), δ 3.61 (m, 2H, CH<sub>2</sub>), δ 2.92 (m, 2H, CH<sub>2</sub>), δ 2.14 (m, 2H, CH<sub>2</sub>), δ 1.70 (m, 2H, CH<sub>2</sub>), δ 1.34 (m, 2H, CH<sub>2</sub>), δ 1.24 (m, 2H, CH<sub>2</sub>), δ 1.16 (m, 2H, CH<sub>2</sub>), δ 0.80 (m, 3H, CH<sub>3</sub>). IR (KBr, cm<sup>-1</sup>): 3320 (N-H str of CONH), 3300 (O-H str of COOH), 3072 (aromatic =C-H str), 2946 (assym.aliphatic –CH<sub>3</sub> str), 2933 (assym. aliphatic -CH<sub>2</sub> str), 2870 (sym. aliphatic –CH<sub>3</sub>str), 1726 (C=O str COOH), 1658 (C=O str of CONH), 1601 (aromatic C=C str), 1541 (N-H deformation of CONH), 1498 (aliphatic -CH<sub>2</sub> deformation), 1444 (aliphatic –CH<sub>3</sub> deformation), 1414, 1245 (C-O str and O-H bending of COOH), 1075 (aromatic C-Brstr), 1027 (aromatic =C-H in plane deformation), 947 (O-H out of plane deformation of COOH).

**4(S)-5-(Phenylamino)-4-(2-(2-bromophenyl) acetamido)-5-oxopentanoic acid (D20)**

Yield: 30.9%. MP 216-218°C. MS (ESI): 443.04 (M+Na<sup>+</sup>+H<sup>+</sup>), 444.04 (M+Na<sup>+</sup>+2H<sup>+</sup>). <sup>1</sup>HNMR (300MHz, DMSO-D<sub>6</sub>, δ ppm): δ 12.16 (s, 1H, COOH), δ 10.02 (s, 1H, CONH), δ 8.38 (d, 1H, CONH, J=7.74), δ 7.01 (m, 9H, Benzene), δ 4.43 (m, 1H, CH), δ 3.67 (s, 2H, CH<sub>2</sub>), δ 2.26 (m, 2H, CH<sub>2</sub>), δ 1.87 (m, 2H, CH<sub>2</sub>). IR (KBr, cm<sup>-1</sup>): 3320 (N-H str of CONH), 3287 (O-H str of COOH), 3072 (aromatic =C-H str), 2946 (assym.aliphatic –CH<sub>3</sub> str), 2933 (assym. aliphatic -CH<sub>2</sub> str), 2870 (sym. aliphatic –CH<sub>3</sub>str), 1726 (C=O str COOH), 1658 (C=O str of CONH), 1601 (aromatic C=C str), 1541 (N-H deformation of CONH), 1498 (aliphatic -CH<sub>2</sub> deformation), 1447 (aliphatic –CH<sub>3</sub> deformation), 1414, 1245 (C-O str and O-H bending of COOH), 1075 (aromatic C-Brstr), 1027 (aromatic =C-H in plane deformation), 947 (O-H out of plane deformation of COOH), 912, 848, 799, 761, 737, 712, 690, 651 (aromatic –C-H out of plane deformation).

**4(S)-5-(Butylamino)-4-(2-(2-fluorophenyl) acetamido)-5-oxopentanoic acid (D21)**

Yield: 39.9%. MP 188-190°C. MS (ESI): 361.15 (M+Na<sup>+</sup>), 362.15 (M+Na<sup>+</sup>+H<sup>+</sup>). <sup>1</sup>HNMR (300MHz, DMSO-D<sub>6</sub>, δ ppm): δ 12.11 (s, 1H, COOH), δ 8.20 (d, 1H, CONH-2, J=8.07), δ 7.85 (m, 1H, CONH-1), δ 7.10 (m, 5H, Benzene), δ 4.19 (m, 1H, CH), δ 3.55 (s, 2H, CH<sub>2</sub>), δ 3.02 (m, 2H, CH<sub>2</sub>), δ 2.18 (m, 2H, CH<sub>2</sub>), δ 1.32 (m, 2H, CH<sub>2</sub>), δ 1.22-1.29 (m, 2H, CH<sub>2</sub>), δ

0.84 (m, 3H, CH<sub>3</sub>). IR (KBr, cm<sup>-1</sup>): 3309 (N-H str of CONH), 3105 (aromatic =C-H str), 2961 (assym. aliphatic -CH<sub>3</sub> str), 2932 (assym. aliphatic -CH<sub>2</sub> str), 2874 (sym. aliphatic -CH<sub>3</sub>str), 1727 (C=O str COOH), 1648 (C=O str of CONH), 1612 (aromatic C=C str), 1544 (N-H deformation of CONH), 1496 (aliphatic -CH<sub>2</sub> deformation), 1446 (aliphatic -CH<sub>3</sub> deformation), 1415, 1231 (C-O str and O-H bending of COOH), 1172 (aromatic C-F str), 1033 (aromatic =C-H in plane deformation), 955 (O-H out of plane deformation of COOH), 955, 924, 848, 800, 760, 712, 647 (aromatic -C-H out of plane deformation).

#### **4(S)-5-(Pentylamino)-4-(2-(2-fluorophenyl) acetamido)-5-oxopentanoic acid (D22)**

Yield: 39.5%. MP 180-182°C. MS (ESI): 375.1 (M+Na<sup>+</sup>), <sup>1</sup>HNMR (300MHz, DMSO-D<sub>6</sub>, δ ppm): δ 12.10 (s, 1H, COOH), δ 8.20 (d, 1H, CONH-2, J=8.07), δ 7.85 (m, 1H, CONH-1), δ 7.10 (m, 5H, Benzene), δ 4.17 (m, 1H, CH), δ 3.65 (m, 2H, CH<sub>2</sub>), δ 2.91 (m, 2H, CH<sub>2</sub>), δ 2.14 (m, 2H, CH<sub>2</sub>), δ 1.69 (m, 2H, CH<sub>2</sub>), δ 1.32 (m, 2H, CH<sub>2</sub>), δ 1.23 (m, 2H, CH<sub>2</sub>), δ 1.13 (m, 2H, CH<sub>2</sub>), δ 0.79 (m, 3H, CH<sub>3</sub>). IR (KBr, cm<sup>-1</sup>): 3319 (N-H str of CONH), 3065 (aromatic =C-H str), 2968 (assym. aliphatic -CH<sub>3</sub> str), 2931 (assym. aliphatic -CH<sub>2</sub> str), 2876 (sym. aliphatic -CH<sub>3</sub> str), 1729 (C=O str COOH), 1649 (C=O str of CONH), 1610 (aromatic C=C str), 1541 (N-H deformation of CONH), 1497 (aliphatic -CH<sub>2</sub> deformation), 1446 (aliphatic -CH<sub>3</sub> deformation), 1413, 1233 (C-O str and O-H bending of COOH), 1172 (aromatic C-F str), 1033 (aromatic =C-H in plane deformation), 955 (O-H out of plane deformation of COOH).

#### **4(S)-5-(Phenylamino)-4-(2-(2-fluorophenyl) acetamido)-5-oxopentanoic acid (D23)**

Yield: 55.1%. MP 213-215°C. MS (ESI): 381.23 (M+Na<sup>+</sup>), 397.25 (M+K<sup>+</sup>). <sup>1</sup>HNMR (300MHz, DMSO-D<sub>6</sub>, δ ppm): δ 10.06 (s, 1H, CONH-1), δ 8.43 (d, 1H, CONH-2, J=7.74), δ 7.06- (m, 9H, Benzene), δ 4.43 (m, 1H, CH), δ 3.58 (s, 2H, CH<sub>2</sub>), δ 2.27 (m, 2H, CH<sub>2</sub>), δ 1.88 (m, 2H, CH<sub>2</sub>), IR (KBr, cm<sup>-1</sup>): 3320 (N-H str of CONH), 3072 (aromatic =C-H str), 2933 (assym. aliphatic -C-H str), 2870 (sym. aliphatic -C-H str), 1726 (C=O str COOH), 1601 (aromatic C=C str), 1541 (N-H deformation), 1447 (aliphatic -C-H deformation), 1414, 1245 (C-O str and O-H bending of COOH)

#### **4(S)-5-(Benzylamino)-4-(2-(2, 4-dichlorophenyl)acetamido)-5-oxopentanoic acid (D24)**

Yield: 55.2%. MP 181-183°C. MS (ESI): 434.1 (M+Na<sup>+</sup>), 413.11 (M+Na<sup>+</sup>+2H<sup>+</sup>), 414.12 (M+Na<sup>+</sup>+3H<sup>+</sup>). <sup>1</sup>HNMR (300MHz, DMSO-D<sub>6</sub>, δ ppm): δ 8.41 (m, 1H, CONH), δ 8.10 (d, 1H, CONH, J=7,971), δ 7.211 (m, 8H, Benzene), δ 4.26 (m, 3H, CH and CH<sub>2</sub>), δ 3.31 (s, 2H,

CH<sub>2</sub>),  $\delta$  2.20 (m, 2H, CH<sub>2</sub>),  $\delta$  1.73 (m, 2H-3). IR (KBr, cm<sup>-1</sup>): 3308 (N-H str of CONH), 3063 (aromatic =C-H str), 2942 (assym. aliphatic -C-H str), 2877 (sym. aliphatic -C-H str), 1723 (C=O str COOH), 1645 (C=O str of CONH), 1604 (aromatic C=C str), 1541 (N-H deformation), 1438 (aliphatic -C-H deformation), 1411, 1260 (C-O str and O-H bending of COOH), 968 (O-H out of plane deformation of COOH).

**4(S)-5-(Hexylamino)-4-(2-(2, 4-dichlorophenyl)acetamido)-5-oxopentanoic acid (D25)**

Yield: 64.8%. MP 145-147°C. MS (ESI): 430.1 (M+H<sup>+</sup>), 405.2 (M+Na<sup>+</sup>). <sup>1</sup>HNMR(300MHz, DMSO-D<sub>6</sub>,  $\delta$  ppm):  $\delta$  12.06 (s, 1H, COOH),  $\delta$  8.40 (m, 1H, CONH),  $\delta$  8.22 (d, 1H, CONH, J=8.31),  $\delta$  7.104 (m, 3H, Benzene),  $\delta$  4.20 (m, 1H, CH),  $\delta$  3.56 (m, 2H, CH<sub>2</sub>),  $\delta$  2.96 (m, 2H, CH<sub>2</sub>),  $\delta$  2.13 (m, 2H, CH<sub>2</sub>),  $\delta$  1.70 (m, 2H, CH<sub>2</sub>),  $\delta$  1.36 (m, 2H, CH<sub>2</sub>),  $\delta$  1.15 (m, 6H, 3CH<sub>2</sub>),  $\delta$  0.78 (m, 3H, CH<sub>3</sub>). IR (KBr, cm<sup>-1</sup>): 3315 (N-Hstr of CONH), 3064 (aromatic =C-H str), 2940 (assym. aliphatic -C-H str), 2874 (sym. aliphatic -C-H str), 1723 (C=O str COOH), 1645 (C=O str of CONH), 1604 (aromatic C=C str), 1542 (N-H deformation), 1439 (aliphatic -CH deformation), 1417, 1269 (C-O str and O-H bending of COOH), 974 (O-H out of plane deformation of COOH).

**4(S)-5-[(2, 2-dimethylethyl) amino]-4-(2-(naphthalen-1-yl)acetamido)-5-oxopentanoic acid (D26)**

Yield: 32.7%. MP 178-180°C. MS (ESI): 379.10 (M+Na<sup>+</sup>), <sup>1</sup>HNMR (300MHz, DMSO-D<sub>6</sub>,  $\delta$  ppm):  $\delta$  12.20 (s, 1H, COOH),  $\delta$  8.31 (d, 1H, CONH, J=7.34),  $\delta$  8.10 (d, 1H, CONH),  $\delta$  7.41 (m, 7H, Naphthalene),  $\delta$  4.20 (m, 1H, CH),  $\delta$  3.96 (m, 1H, CH),  $\delta$  3.78 (s, 2H, CH<sub>2</sub>),  $\delta$  2.10 (m, 2H, CH<sub>2</sub>),  $\delta$  1.69 (m, 2H, CH<sub>2</sub>),  $\delta$  1.29 (m, 9H, 3CH<sub>3</sub>). IR (KBr, cm<sup>-1</sup>): 3284 (N-H str of CONH), 3159 (O-H str of COOH), 3069 (aromatic =C-H str), 2971 (assym.aliphatic -CH<sub>3</sub> str), 2933 (assym. aliphatic -CH<sub>2</sub> str), 2874 (sym. aliphatic -CH<sub>3</sub> str), 1714 (C=O str COOH), 1632 (C=O str of CONH), 1599 (aromatic C=C str), 1545 (N-H deformation of CONH), 1446 (aliphatic -CH<sub>3</sub> deformation), 1410, 1227 (C-O str and O-H bending of COOH), 1386 (aliphatic -CH deformation), 1017 (aromatic =C-H in plane deformation), 958 (O-H out of plane deformation of COOH), 924, 856, 784, 733, 663, 609 (aromatic -C-H out of plane deformation).

**4(S)-5-(i-propylamino)-4-(2-(naphthalen-1-yl)acetamido)-5-oxopentanoic acid (D27)**

MS (ESI): 378.98 (M+Na<sup>+</sup>), 380.00 (M+Na<sup>+</sup>+H<sup>+</sup>). <sup>1</sup>HNMR (300MHz, DMSO-D<sub>6</sub>,  $\delta$  ppm):  $\delta$  12.24 (s, 1H, COOH),  $\delta$  8.31 (d, 1H, CONH, J=7.34),  $\delta$  8.06 (d, 1H, CONH),  $\delta$  7.41 (m, 7H,

Naphthalene),  $\delta$  4.19 (m, 1H, CH),  $\delta$  3.94 (m, 1H, CH),  $\delta$  3.77 (s, 2H, CH<sub>2</sub>),  $\delta$  2.14 (m, 2H, CH<sub>2</sub>),  $\delta$  1.73 (m, 2H, CH<sub>2</sub>),  $\delta$  0.98 (d, 6H, 2CH<sub>3</sub>). IR (KBr, cm<sup>-1</sup>): 3286 (N-H str of CONH), 3159 (O-H str of COOH), 3069 (aromatic =C-H str), 2971 (assym.aliphatic -CH<sub>3</sub> str), 2933 (assym. aliphatic -CH<sub>2</sub> str), 2874 (sym. aliphatic -CH<sub>3</sub> str), 1714 (C=O str COOH), 1632 (C=O str of CONH), 1599 (aromatic C=C str), 1545 (N-H deformation of CONH), 1446 (aliphatic -CH<sub>3</sub> deformation), 1410,1227 (C-O str and O-H bending of COOH), 1386 (aliphatic -CH deformation), 1017 (aromatic =C-H in plane defromation), 958 (O-H out of plane deformation of COOH), 924,856,784,733,663,609 (aromatic -C-H out of plane deformation).

#### **4(S)-5-(Benzylamino)-4-(2-(naphthalen-1-yl) acetamido)-5-oxopentanoic acid (D28)**

Yield: 54.2%. MP 178-180. MS (ESI): 404.4 (M+H<sup>+</sup>). <sup>1</sup>HNMR (300MHz, DMSO-D<sub>6</sub>,  $\delta$  ppm):  $\delta$  12.10 (s, 1H, COOH),  $\delta$  8.26 (d, 1H, CONH, J=7.37),  $\delta$  8.10 (d, 1H, CONH),  $\delta$  7.01 (m, 12H, naphthalene and benzene),  $\delta$  4.36 (m, 1H, CH),  $\delta$  4.30 (m, 2H, CH<sub>2</sub>),  $\delta$  3.58 (s, 2H, CH<sub>2</sub>),  $\delta$  2.16 (m, 2H, CH<sub>2</sub>),  $\delta$  1.85 and 1.74 (m, 2H, CH<sub>2</sub>). IR (KBr, cm<sup>-1</sup>): 3069 (aromatic =C-H str), 2971 (assym.aliphatic -CH<sub>3</sub> str), 2933 (assym. aliphatic -CH<sub>2</sub> str), 2874 (sym. aliphatic -CH<sub>3</sub> str), 1714 (C=O str COOH), 1632 (C=O str of CONH), 1599 (aromatic C=C str), 1545 (N-H deformation of CONH), 1511 (aliphatic -CH<sub>2</sub> deformation), 1445 (aliphatic -CH<sub>3</sub> deformation), 1389 (aliphatic -CH deformation), 1017 (aromatic =C-H in plane defromation), 958 (O-H out of plane deformation of COOH), 924,856,784,733,663,609 (aromatic -C-H out of plane deformation).

#### **4(S)-5-(Hexylamino)-4-(2-(naphthalen-1-yl) acetamido)-5-oxopentanoic acid (D29)**

Yield: 30.3%. MP 138-140. MS (ESI): 421.1 (M+H<sup>+</sup>). <sup>1</sup>HNMR (300MHz, DMSO-D<sub>6</sub>,  $\delta$  ppm):  $\delta$  12.15 (s, 1H, COOH),  $\delta$  8.20 (d, 1H, CONH, J=7.40),  $\delta$  8.10 (d, 1H, CONH),  $\delta$  7.14 (m, 7H, naphthalene),  $\delta$  4.30 (m, 1H, CH),  $\delta$  4.17 (m, 2H, CH<sub>2</sub>),  $\delta$  3.76 (s, 2H, CH<sub>2</sub>),  $\delta$  2.20 (m, 2H, CH<sub>2</sub>),  $\delta$  1.86 and 1.75 (m, 2H, CH<sub>2</sub>). IR (KBr, cm<sup>-1</sup>): 3284 (N-H str of CONH), 3159 (O-H str of COOH), 3069 (aromatic =C-H str), 2971 (assym. aliphatic -CH<sub>3</sub> str), 2933 (assym. aliphatic -CH<sub>2</sub> str), 2874 (sym. aliphatic -CH<sub>3</sub> str), 1714 (C=O str COOH), 1632 (C=O str of CONH), 1599 (aromatic C=C str), 1545 (N-H deformation of CONH), 1446 (aliphatic -CH<sub>3</sub> deformation), 1410,1227 (C-O str and O-H bending of COOH), 1368 (aliphatic -CH deformation), 1019 (aromatic =C-H in plane defromation), 958 (O-H out of plane deformation of COOH), 924,856,784,733,663,609 (aromatic -C-H out of plane deformation).

**4(S)-5-(4-Chlorobenzylamino)-4-(2-(4-bromophenyl) acetamido)-5-oxopentanoic acid (D30)**

Yield: 41.1%. MP 165-167°C. MS (ESI): 490.10 (M+Na<sup>+</sup>), <sup>1</sup>HNMR (300MHz, DMSO-D<sub>6</sub>, δ ppm): δ 12.14 (s, 1H, COOH), δ 8.33 (m, 1H, CONH), δ 8.25 (d, 1H, CONH, J=7.92), δ 7.44 (m, 2H, Benzene), δ 7.20 (m, 2H, Benzene), δ 7.05 (m, 2H, Benzene), δ 6.95 (m, 2H, Benzene), δ 4.30 (m, 1H, CH), δ 4.20 (s, 2H, CH<sub>2</sub>), δ 3.72 (m, 3H, CH<sub>3</sub>), δ 3.42 (m, 2H, CH<sub>2</sub>), δ 2.16 (m, 2H, CH<sub>2</sub>), δ 1.70 (m, 2H, CH<sub>2</sub>). IR (KBr, cm<sup>-1</sup>): 3319 (N-H str of CONH), 3061 (aromatic =C-H str), 2946 (assym. aliphatic -C-H str), 2873 (sym. aliphatic -C-H str), 1727 (C=O str COOH), 1647 (C=O str of CONH), 1604 (aromatic C=C str), 1542 (N-H deformation), 1439 (aliphatic -C-H deformation), 1418, 1262 (C-O str and O-H bending of COOH), 966 (O-H out of plane deformation of COOH), 806, 750, 696, 651 (aromatic -C-H out of plane deformation).

**4(S)-5-(4-Fluorobenzylamino)-4-(2-(4-bromophenyl) acetamido)-5-oxopentanoic acid (D31)**

Yield: 29.5%. MP 153-155°C. MS (ESI): 474.10 (M+Na<sup>+</sup>), <sup>1</sup>HNMR (300MHz, DMSO-D<sub>6</sub>, δ ppm): δ 12.16 (s, 1H, COOH), δ 8.32 (m, 1H, CONH), δ 8.24 (d, 1H, CONH, J=7.85), δ 7.43 (m, 2H, Benzene), δ 7.21 (m, 2H, Benzene), δ 7.06 (m, 2H, Benzene), δ 6.85 (m, 2H, Benzene), δ 4.32 (m, 1H, CH), δ 4.21 (s, 2H, CH<sub>2</sub>), δ 3.70 (m, 3H, CH<sub>3</sub>), δ 3.46 (m, 2H, CH<sub>2</sub>), δ 2.18 (m, 2H, CH<sub>2</sub>), δ 1.75 (m, 2H, CH<sub>2</sub>). IR (KBr, cm<sup>-1</sup>): 3309 (N-H str of CONH), 3063 (aromatic =C-H str), 2942 (assym. aliphatic -C-H str), 2877 (sym. aliphatic -C-H str), 1729 (C=O str COOH), 1647 (C=O str of CONH), 1604 (aromatic C=C str), 1542 (N-H deformation), 1439 (aliphatic -C-H deformation), 1423, 1256 (C-O str and O-H bending of COOH), 966 (O-H out of plane deformation of COOH), 806, 750, 696, 651 (aromatic -C-H out of plane deformation).

**4(S)-5-(3, 4-Dichlorobenzylamino)-4-(2-(4-bromophenyl) acetamido)-5-oxopentanoic acid (D32)**

Yield: 27.8%. MP 185-187°C MS (ESI): 525.2 (M+Na<sup>+</sup>), <sup>1</sup>HNMR (300MHz, DMSO-D<sub>6</sub>, δ ppm): δ 12.10 (s, 1H, COOH), δ 8.30 (m, 1H, CONH), δ 8.21 (d, 1H, CONH, J=7.92), δ 7.32 (m, 2H, Benzene), δ 6.85 (m, 5H, Benzene), δ 4.32 (m, 1H, CH), δ 4.23 (s, 2H, CH<sub>2</sub>), δ 3.71 (m, 3H, CH<sub>3</sub>), δ 3.48 (m, 2H, CH<sub>2</sub>), δ 2.18 (m, 2H, CH<sub>2</sub>), δ 1.78 (m, 2H, CH<sub>2</sub>). IR (KBr, cm<sup>-1</sup>): 3065 (aromatic =C-H str), 2912 (assym. aliphatic -C-H str), 2865 (sym. aliphatic -C-H

str), 1732 (C=O str COOH), 1647 (C=O str of CONH), 1604 (aromatic C=C str), 1542 (N-H deformation), 1439 (aliphatic -C-H deformation), 966 (O-H out of plane deformation of COOH), 806, 750, 696, 651 (aromatic -C-H out of plane deformation).

**4(S)-5-(4-Nitrobenzylamino)-4-(2-(4-bromophenyl) acetamido)-5-oxopentanoic acid (D33)**

MS (ESI): 501.2 (M+Na<sup>+</sup>), <sup>1</sup>HNMR (300MHz, DMSO-D<sub>6</sub>, δ ppm): δ 12.10 (s, 1H, COOH), δ 8.30 (m, 1H, CONH), δ 8.21 (d, 1H, CONH, J=7.92), δ 8.05 (m, 2H, Benzene), δ 7.30 (m, 4H, Benzene), δ 6.85 (m, 2H, Benzene), δ 4.32 (m, 1H, CH), δ 4.21 (s, 2H, CH<sub>2</sub>), δ 3.70 (m, 3H, CH<sub>3</sub>), δ 3.48 (m, 2H, CH<sub>2</sub>), δ 2.12 (m, 2H, CH<sub>2</sub>), δ 1.69 (m, 2H, CH<sub>2</sub>). IR (KBr, cm<sup>-1</sup>): 3310 (N-H str of CONH), 3060 (aromatic =C-H str), 2952 (assym. aliphatic -C-H str), 2867 (sym. aliphatic -C-H str), 1723 (C=O str COOH), 1647 (C=O str of CONH), 1604 (aromatic C=C str), 1542 (N-H deformation), 1441 (aliphatic -C-H deformation), 966 (O-H out of plane deformation of COOH), 806, 750, 696, 651 (aromatic -C-H out of plane deformation).

**4(S)-5-(4-Methoxybenzylamino)-4-(2-(4-bromophenyl) acetamido)-5-oxopentanoic acid (D34)**

Yield: 28.3%. MP 198-200°C MS (ESI): 490.1 (M+Na<sup>+</sup>). <sup>1</sup>HNMR (300MHz, DMSO-D<sub>6</sub>, δ ppm): δ 12.09 (s, 1H, COOH), δ 8.33 (m, 1H, CONH), δ 8.25 (d, 1H, CONH, J=7.92), δ 7.44 (m, 2H, Benzene), δ 7.18 (m, 2H, Benzene), δ 7.10 (m, 2H, Benzene), δ 6.82 (m, 2H, Benzene), δ 4.23 (m, 1H, CH), δ 4.16 (s, 2H, CH<sub>2</sub>), δ 3.70 (m, 3H, CH<sub>3</sub>), δ 3.40 (m, 2H, CH<sub>2</sub>), δ 2.14 (m, 2H, CH<sub>2</sub>), δ 1.69 (m, 2H, CH<sub>2</sub>). IR (KBr, cm<sup>-1</sup>): 3316 (N-H str of CONH), 3063 (aromatic =C-H str), 2946 (assym. aliphatic -C-H str), 2877 (sym. aliphatic -C-H str), 1725 (C=O str COOH), 1647 (C=O str of CONH), 1604 (aromatic C=C str), 1542 (N-H deformation), 1439 (aliphatic -C-H deformation), 1414, 1266 (C-O str and O-H bending of COOH), 966 (O-H out of plane deformation of COOH), 806, 750, 696, 651 (aromatic -C-H out of plane deformation).

**4(S)-5-(2-Chlorobenzylamino)-4-(2-(4-bromophenyl) acetamido)-5-oxopentanoic acid (D35)**

Yield: 32.5%. MP 135-137°C MS (ESI): 490.2 (M+Na<sup>+</sup>), <sup>1</sup>HNMR (300MHz, DMSO-D<sub>6</sub>, δ ppm): δ 12.10 (s, 1H, COOH), δ 8.33 (m, 1H, CONH), δ 8.24 (d, 1H, CONH, J=7.92), δ 7.36 (m, 2H, Benzene), δ 6.85 (m, 6H, Benzene), δ 4.46 (m, 1H, CH), δ 4.30 (s, 2H, CH<sub>2</sub>), δ 3.70



(m, 3H, CH<sub>3</sub>),  $\delta$  3.32 (m, 2H, CH<sub>2</sub>),  $\delta$  2.16 (m, 2H, CH<sub>2</sub>),  $\delta$  1.70 (m, 2H, CH<sub>2</sub>). IR (KBr, cm<sup>-1</sup>): 3308 (N-H str of CONH), 3061 (aromatic =C-H str), 2940 (assym. aliphatic -C-H str), 2873 (sym. aliphatic -C-H str), 1727 (C=O str COOH), 1647 (C=O str of CONH), 1604 (aromatic C=C str), 1542 (N-H deformation), 1439 (aliphatic -C-H deformation), 1416, 1266 (C-O str and O-H bending of COOH), 966 (O-H out of plane deformation of COOH), 806, 750, 696, 651 (aromatic -C-H out of plane deformation).

The HMBC spectra of **D23** are presented in Figure TS2. Cross peaks were found between N5-H (10.06) and C4 (171.62), N3-H (4.43) and C4 (171.62) as well as C7-H (2.30) and C8 (174.21). No cross-peak was observed between N5-H (10.06) and C8 (174.21). It confirms that the conformations of the aromatic amine derivatives remain consistent to the proposed conformations. In addition, <sup>1</sup>NMR spectra of some synthesized final compounds are presented in Figures TS3-TS12.

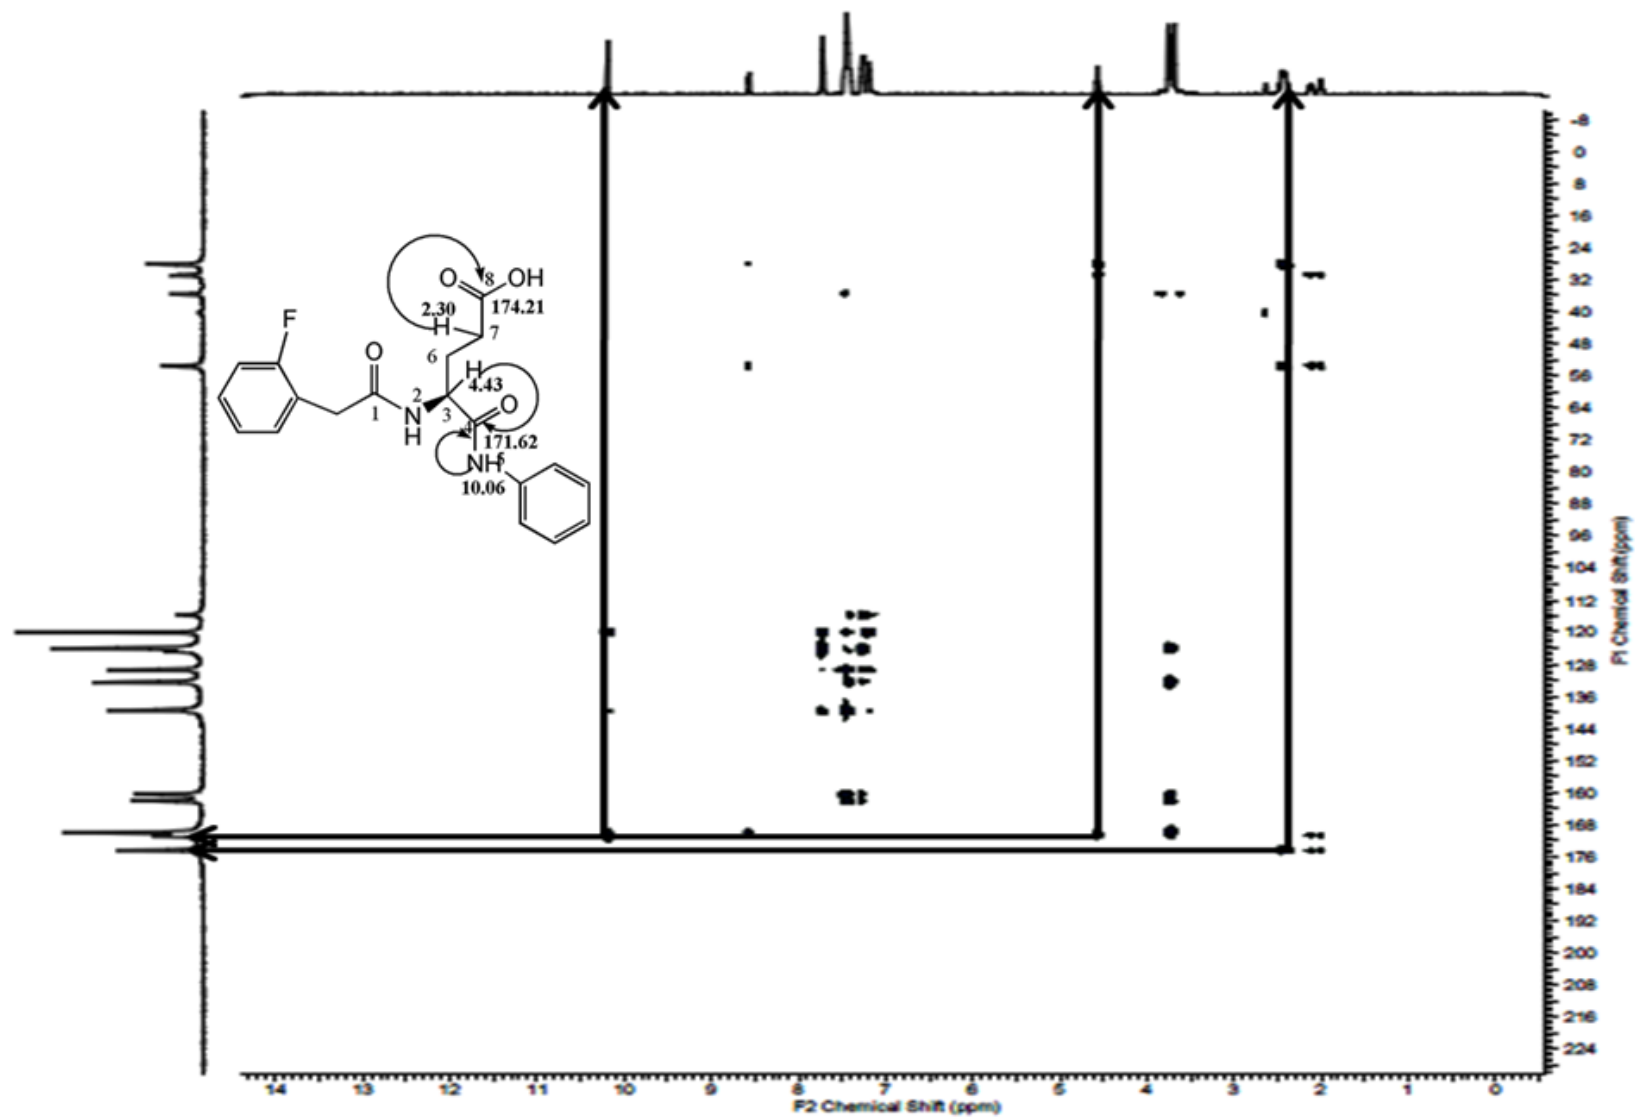

Figure TS2. HMBC spectrum of Cpd. D23

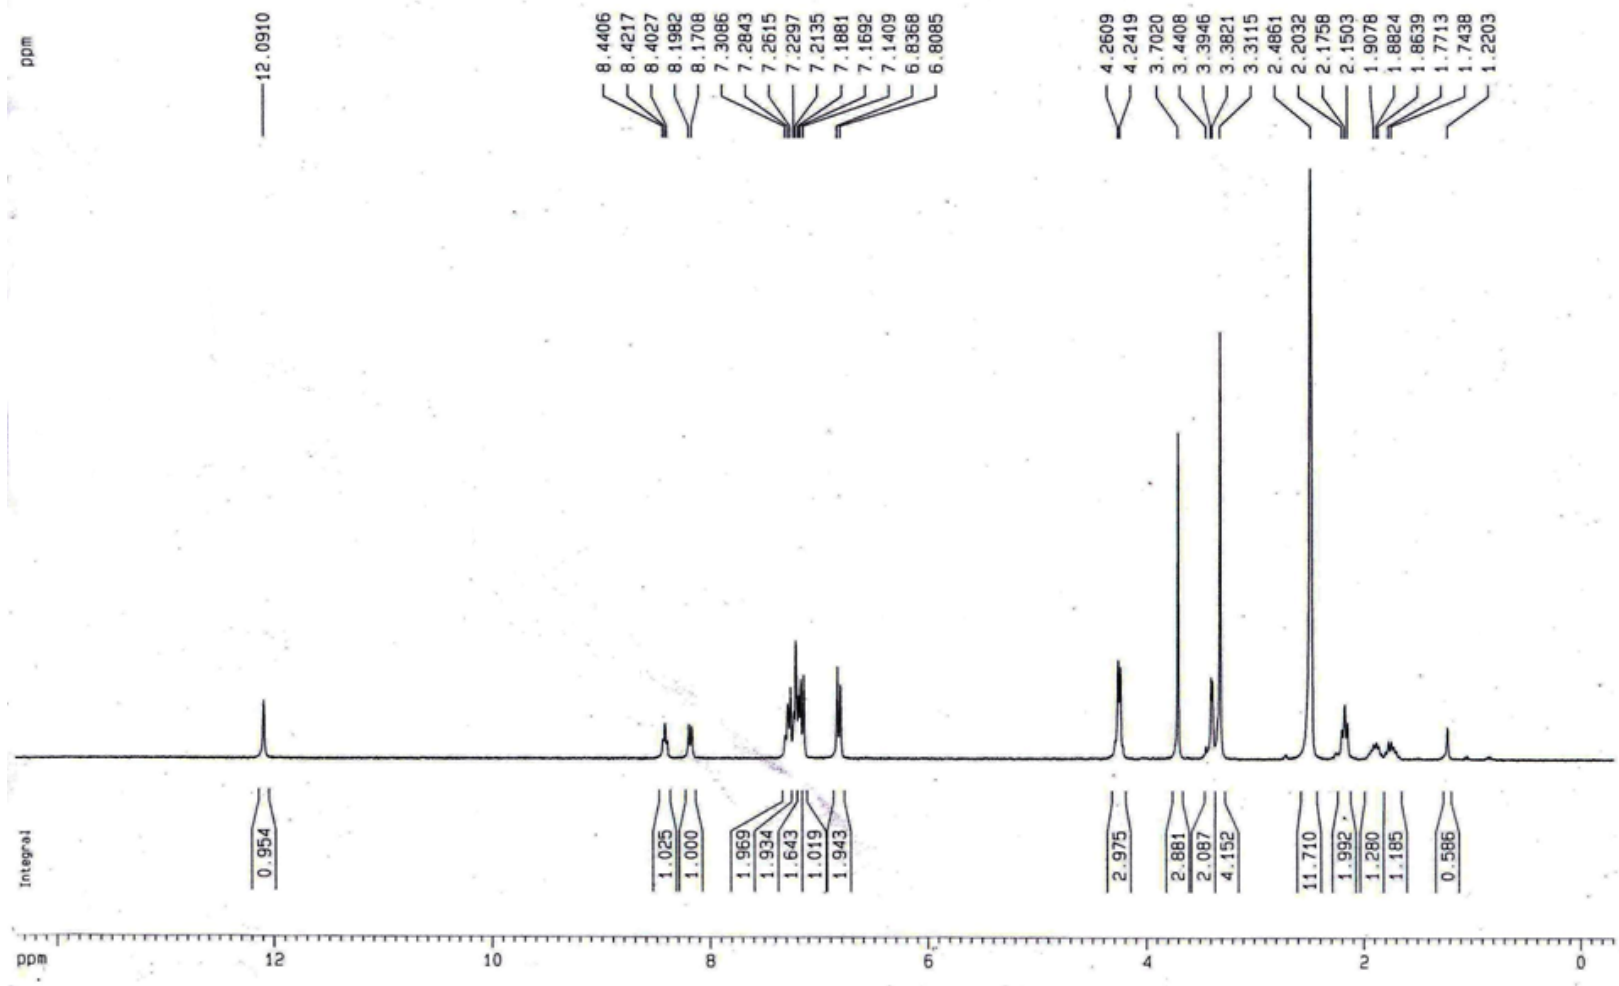

Figure TS3 <sup>1</sup>H NMR spectra of D5

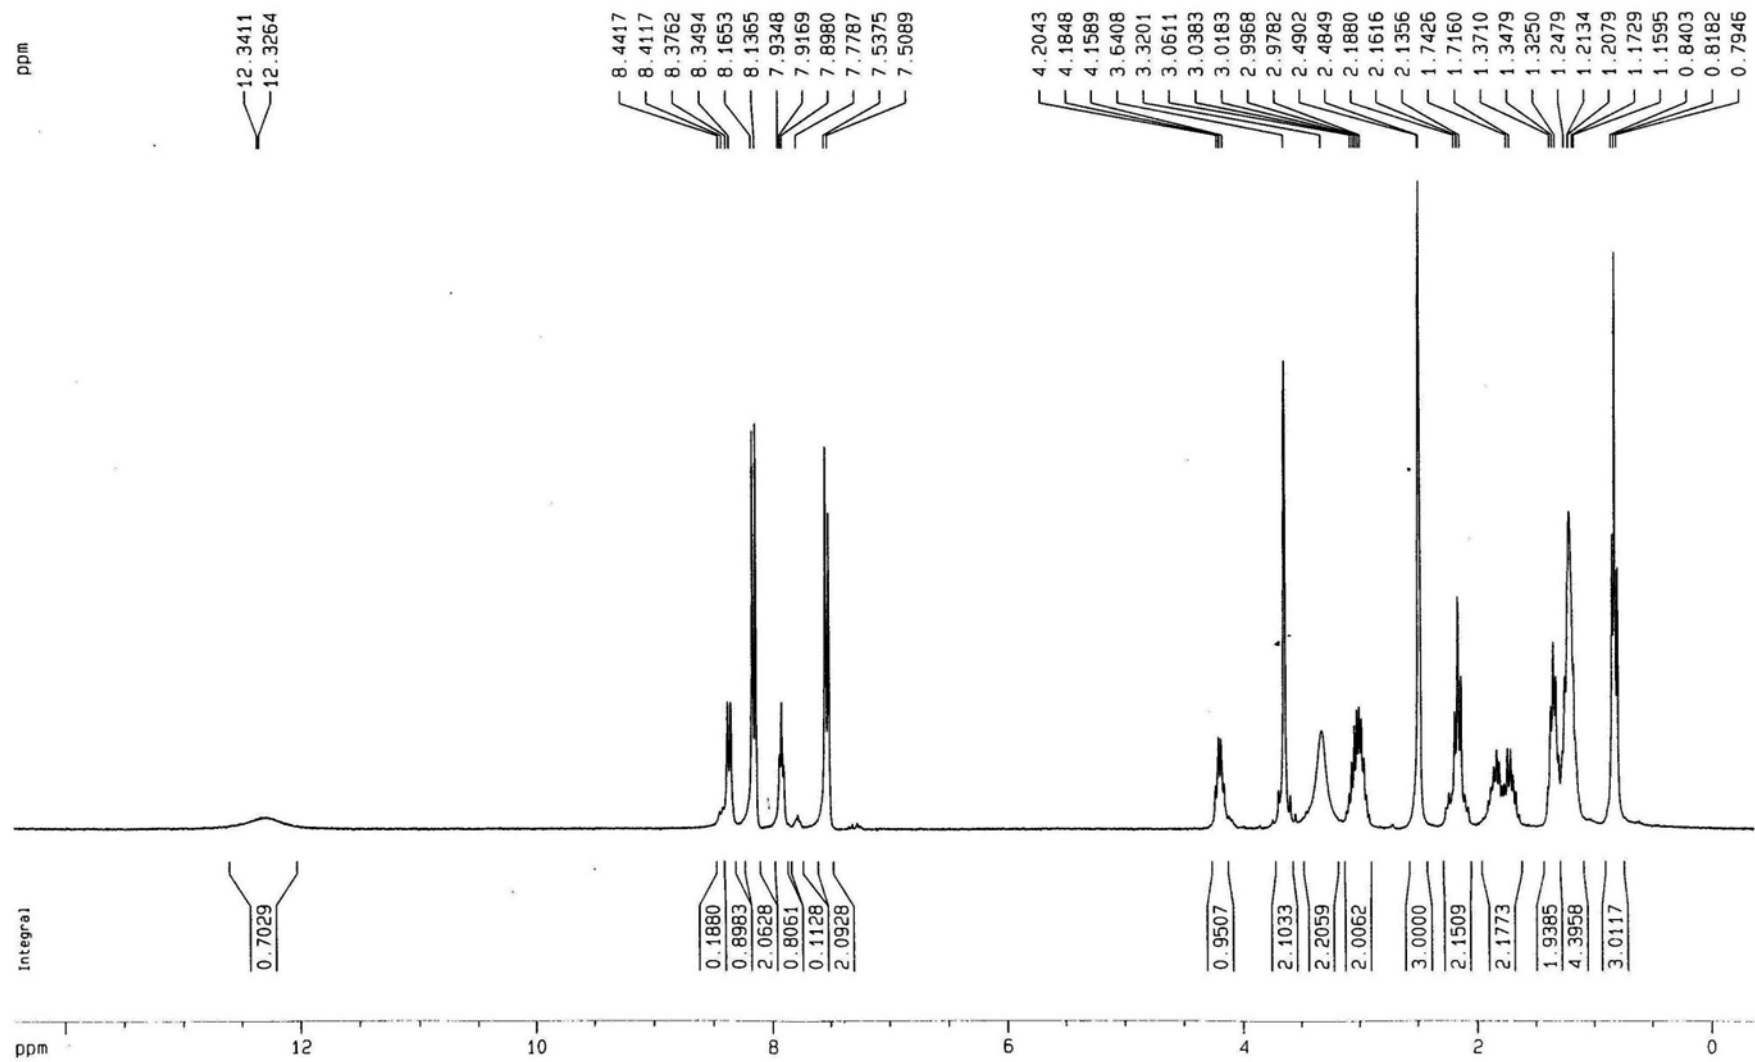

Figure TS4 <sup>1</sup>H NMR spectra of D7

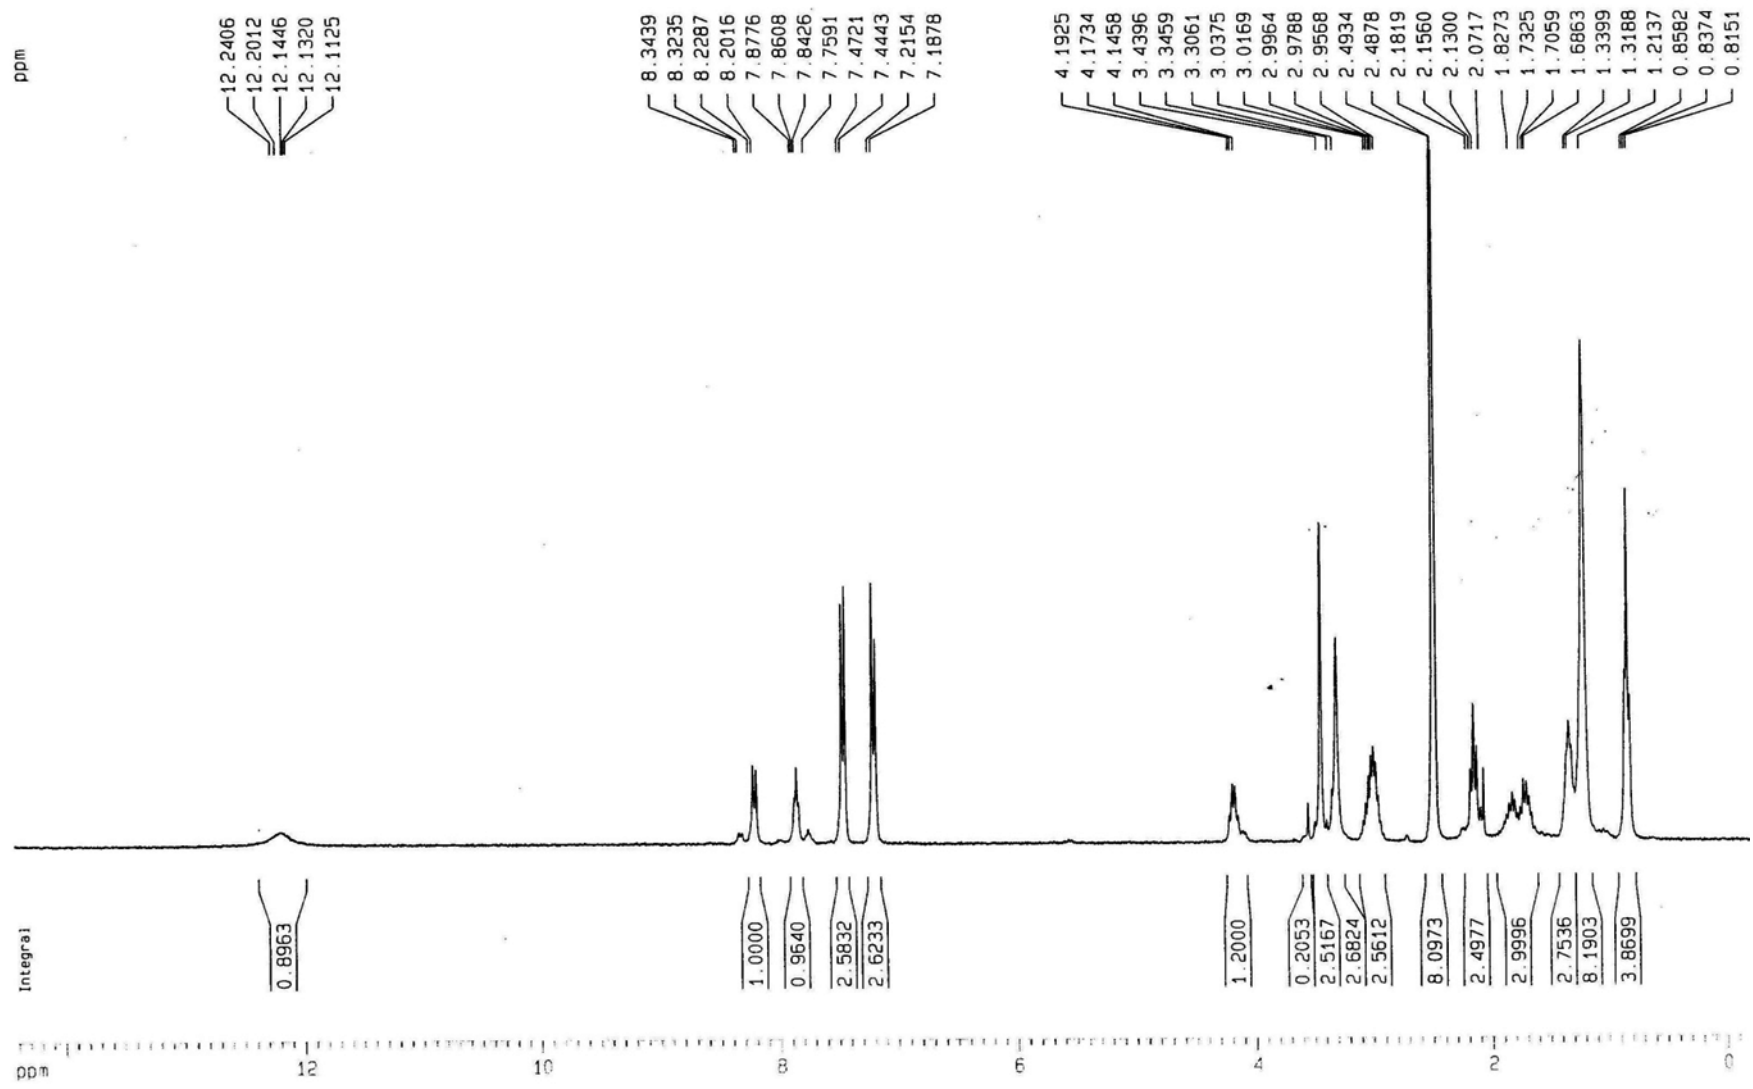

Figure TS5 <sup>1</sup>H NMR spectra of D12

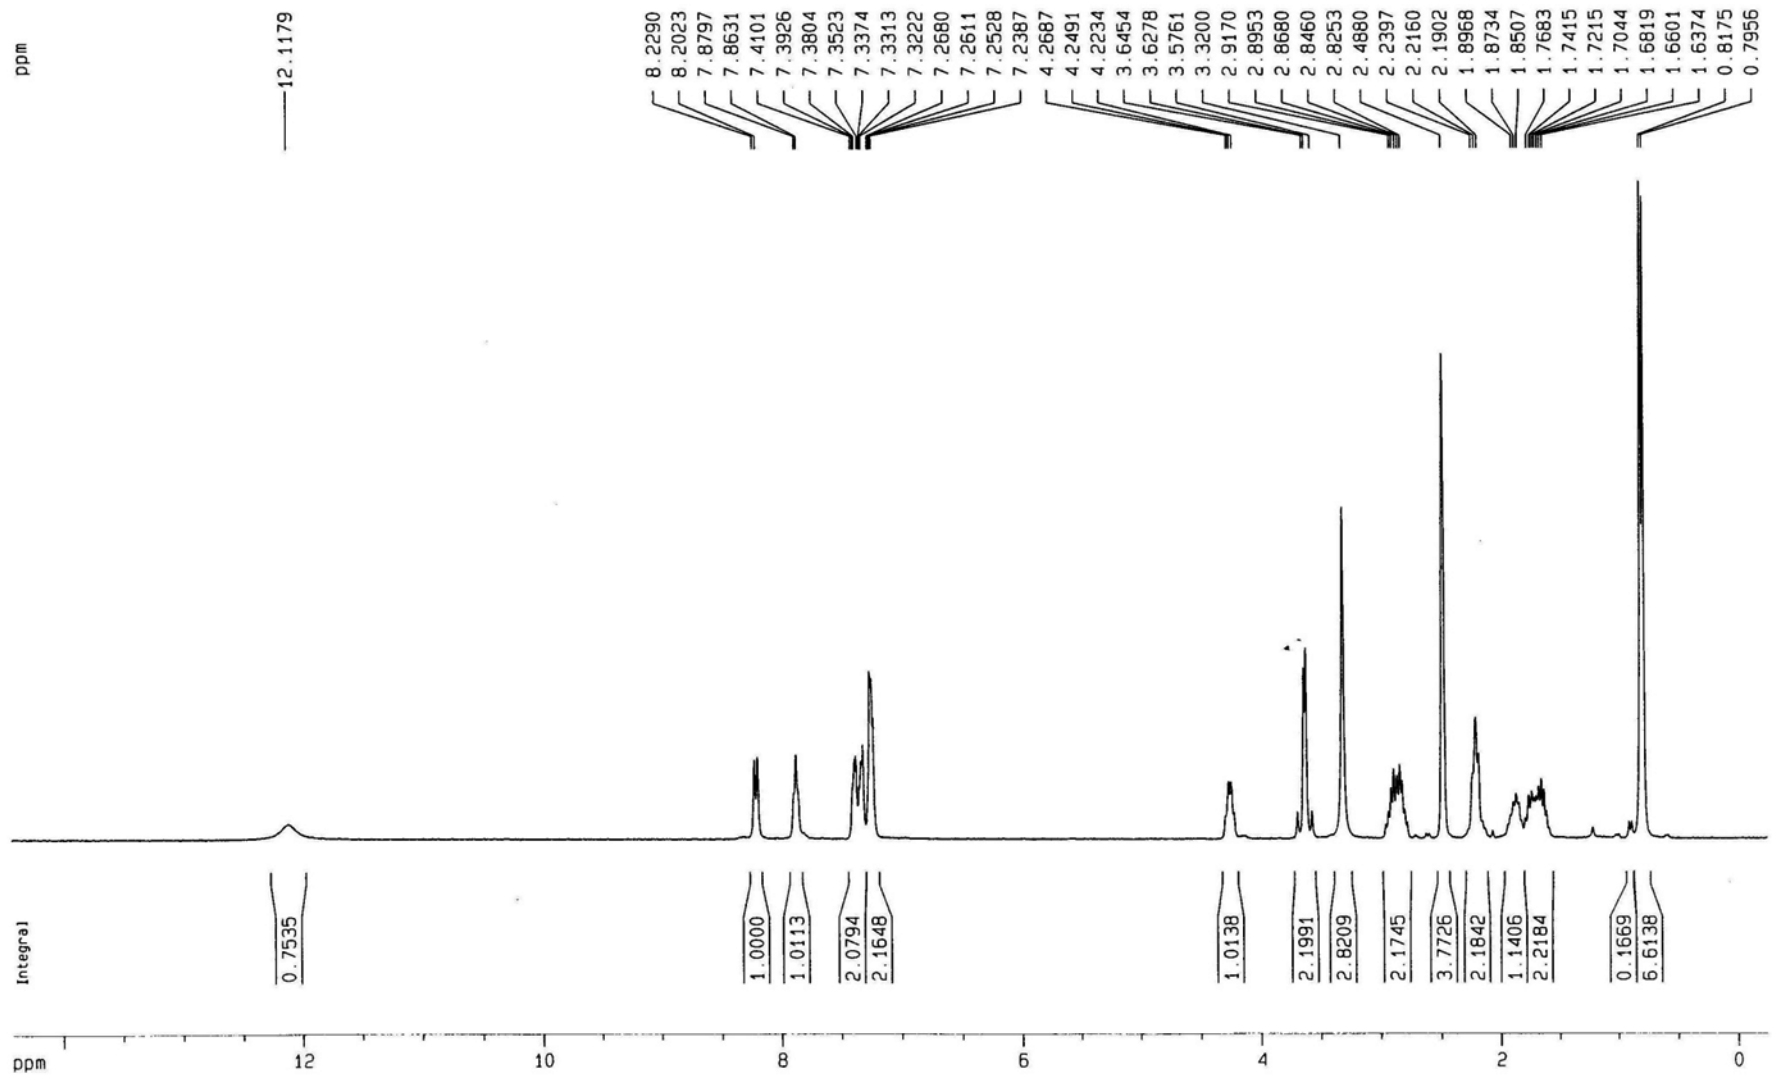

Figure TS6 <sup>1</sup>H NMR spectra of D13

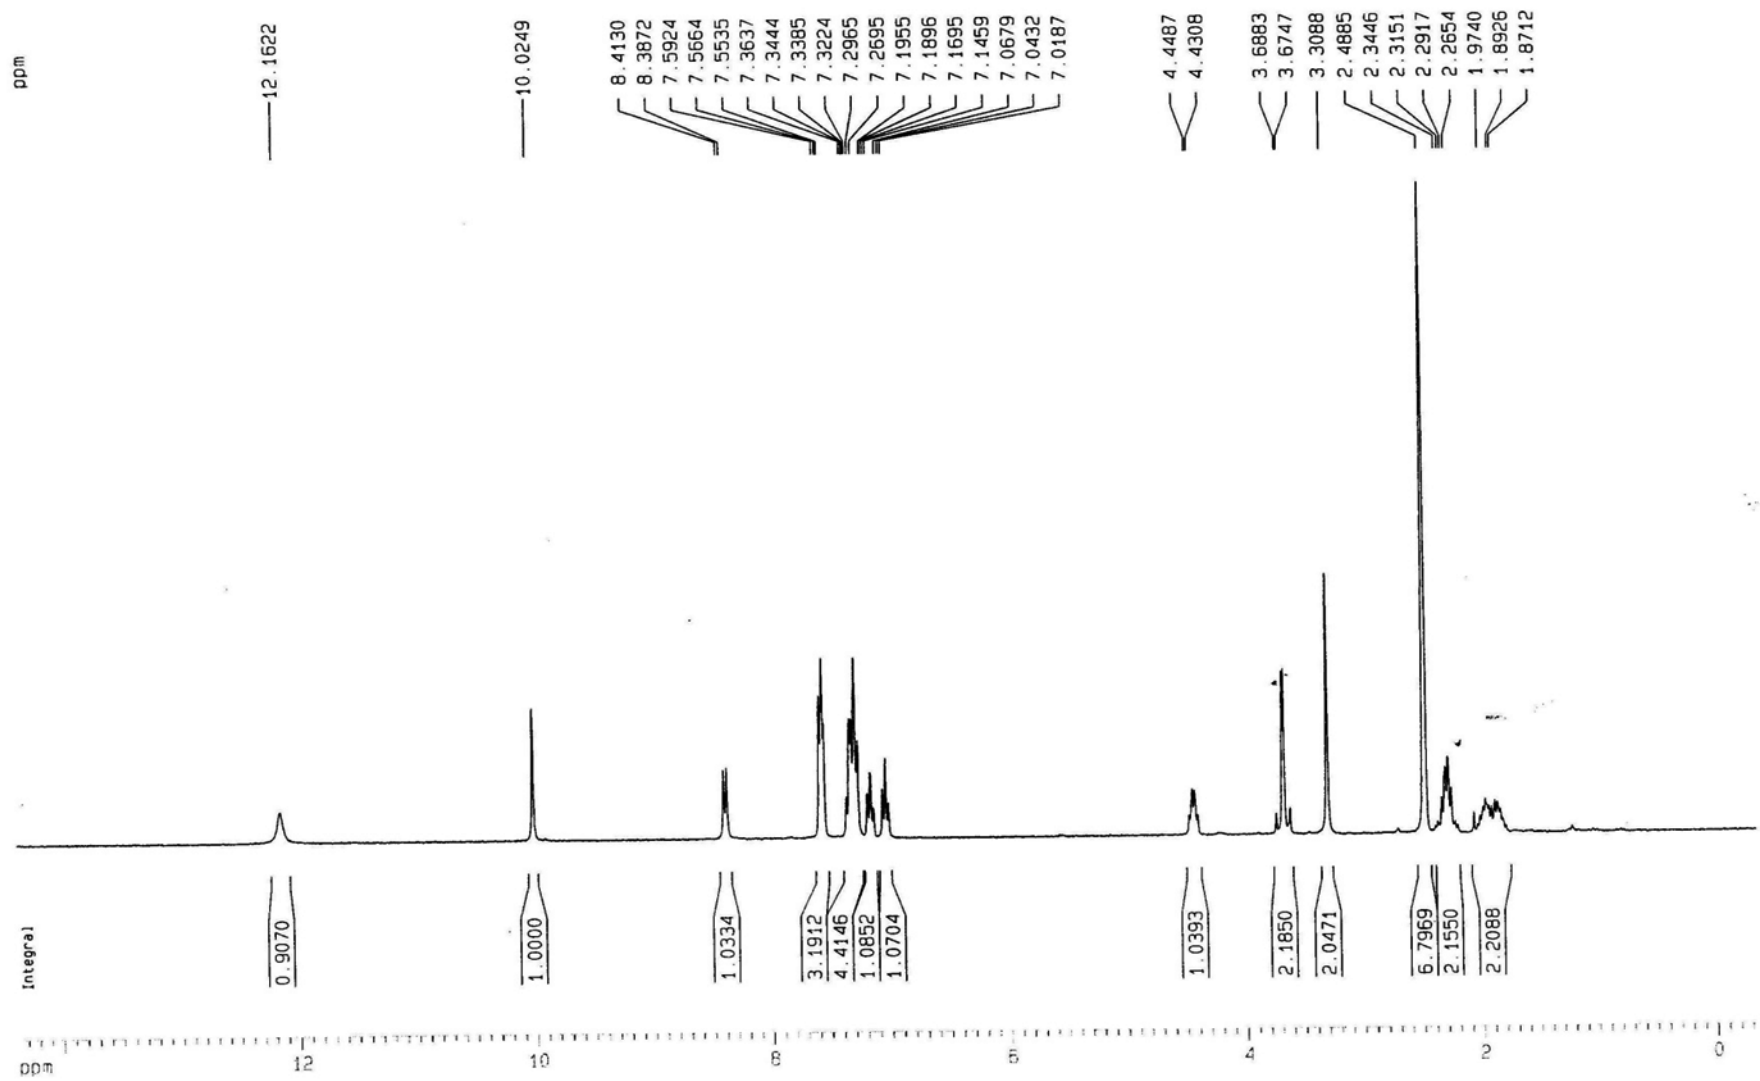

Figure TS7  $^1\text{H}$  NMR spectra of D20

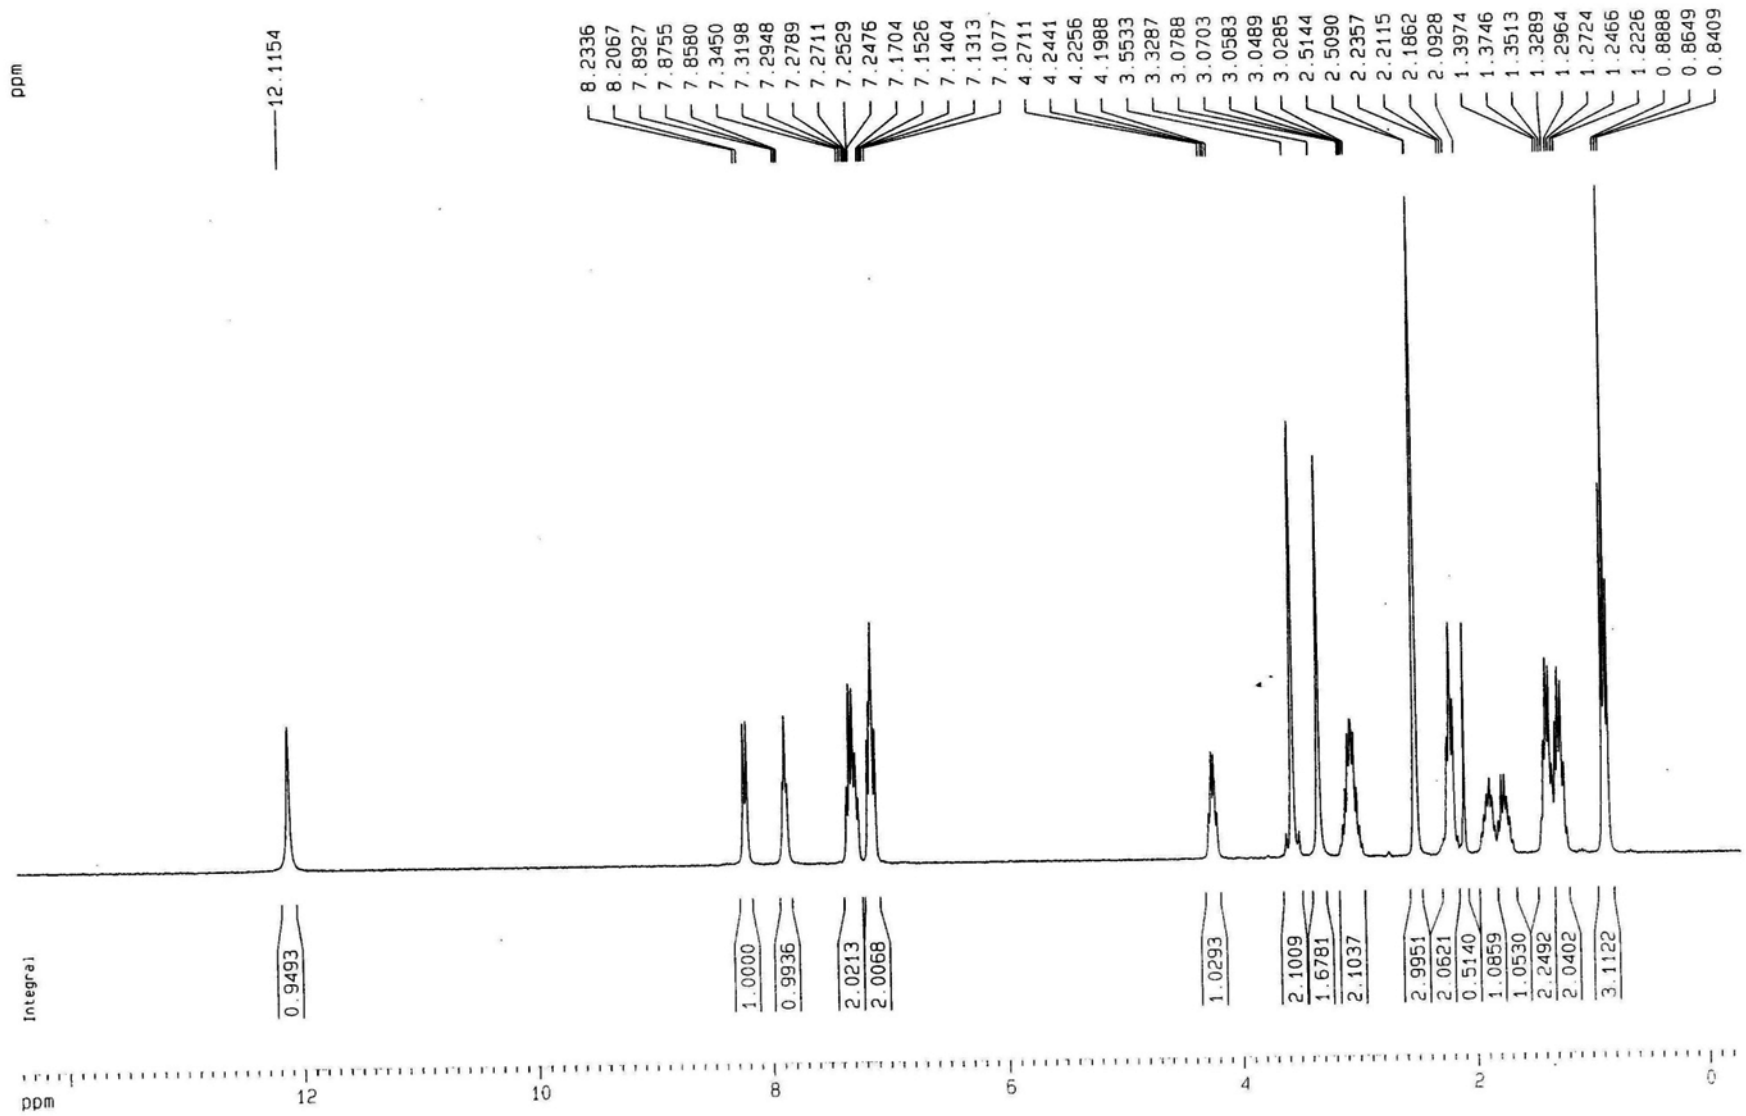

Figure TS8 <sup>1</sup>H NMR spectra of D21



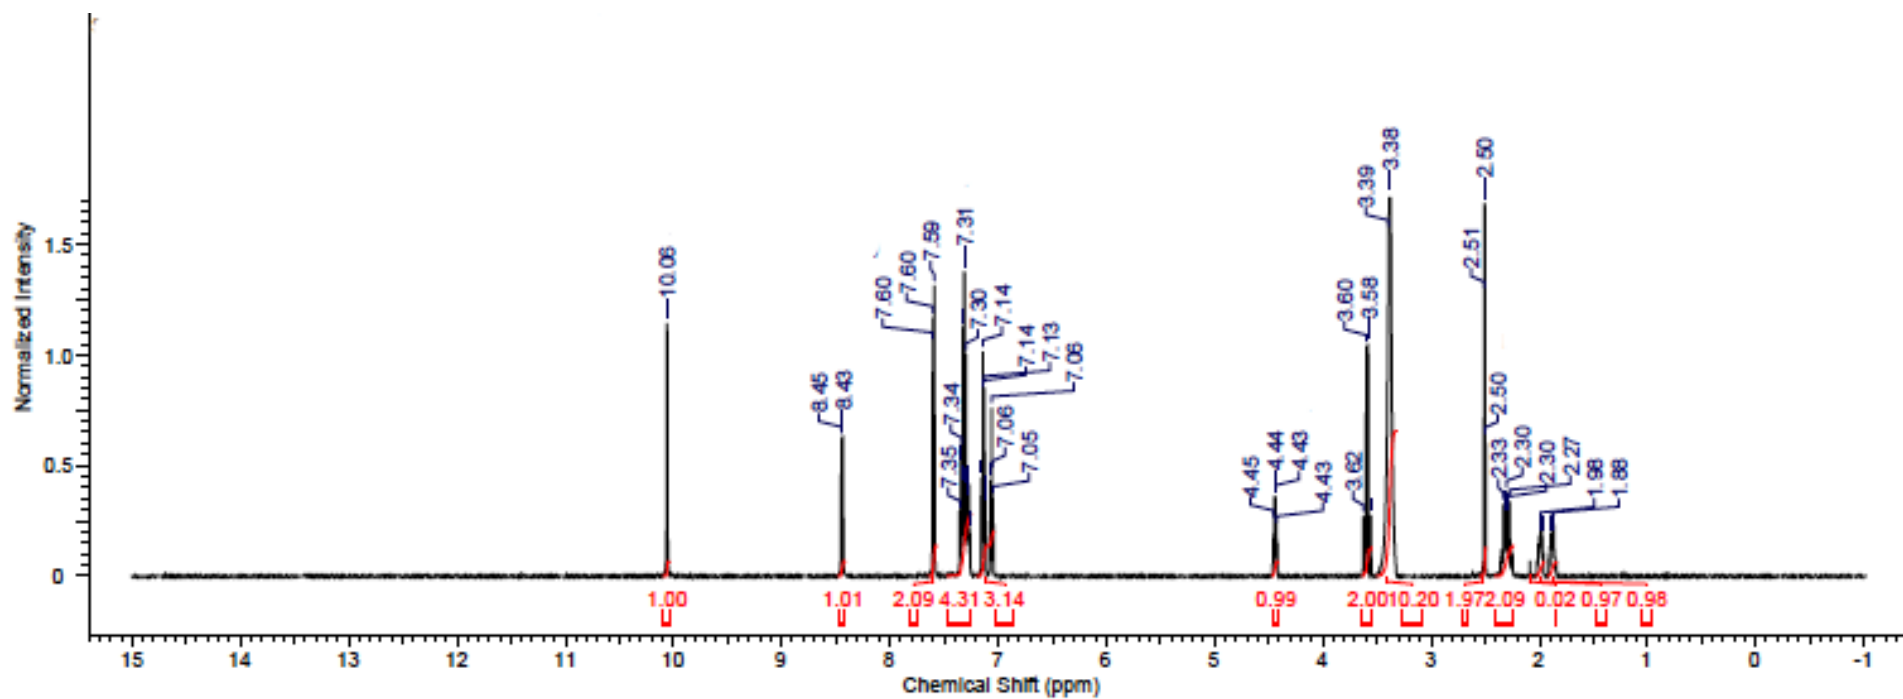

Figure TS9  $^1\text{H}$  NMR spectra of D23

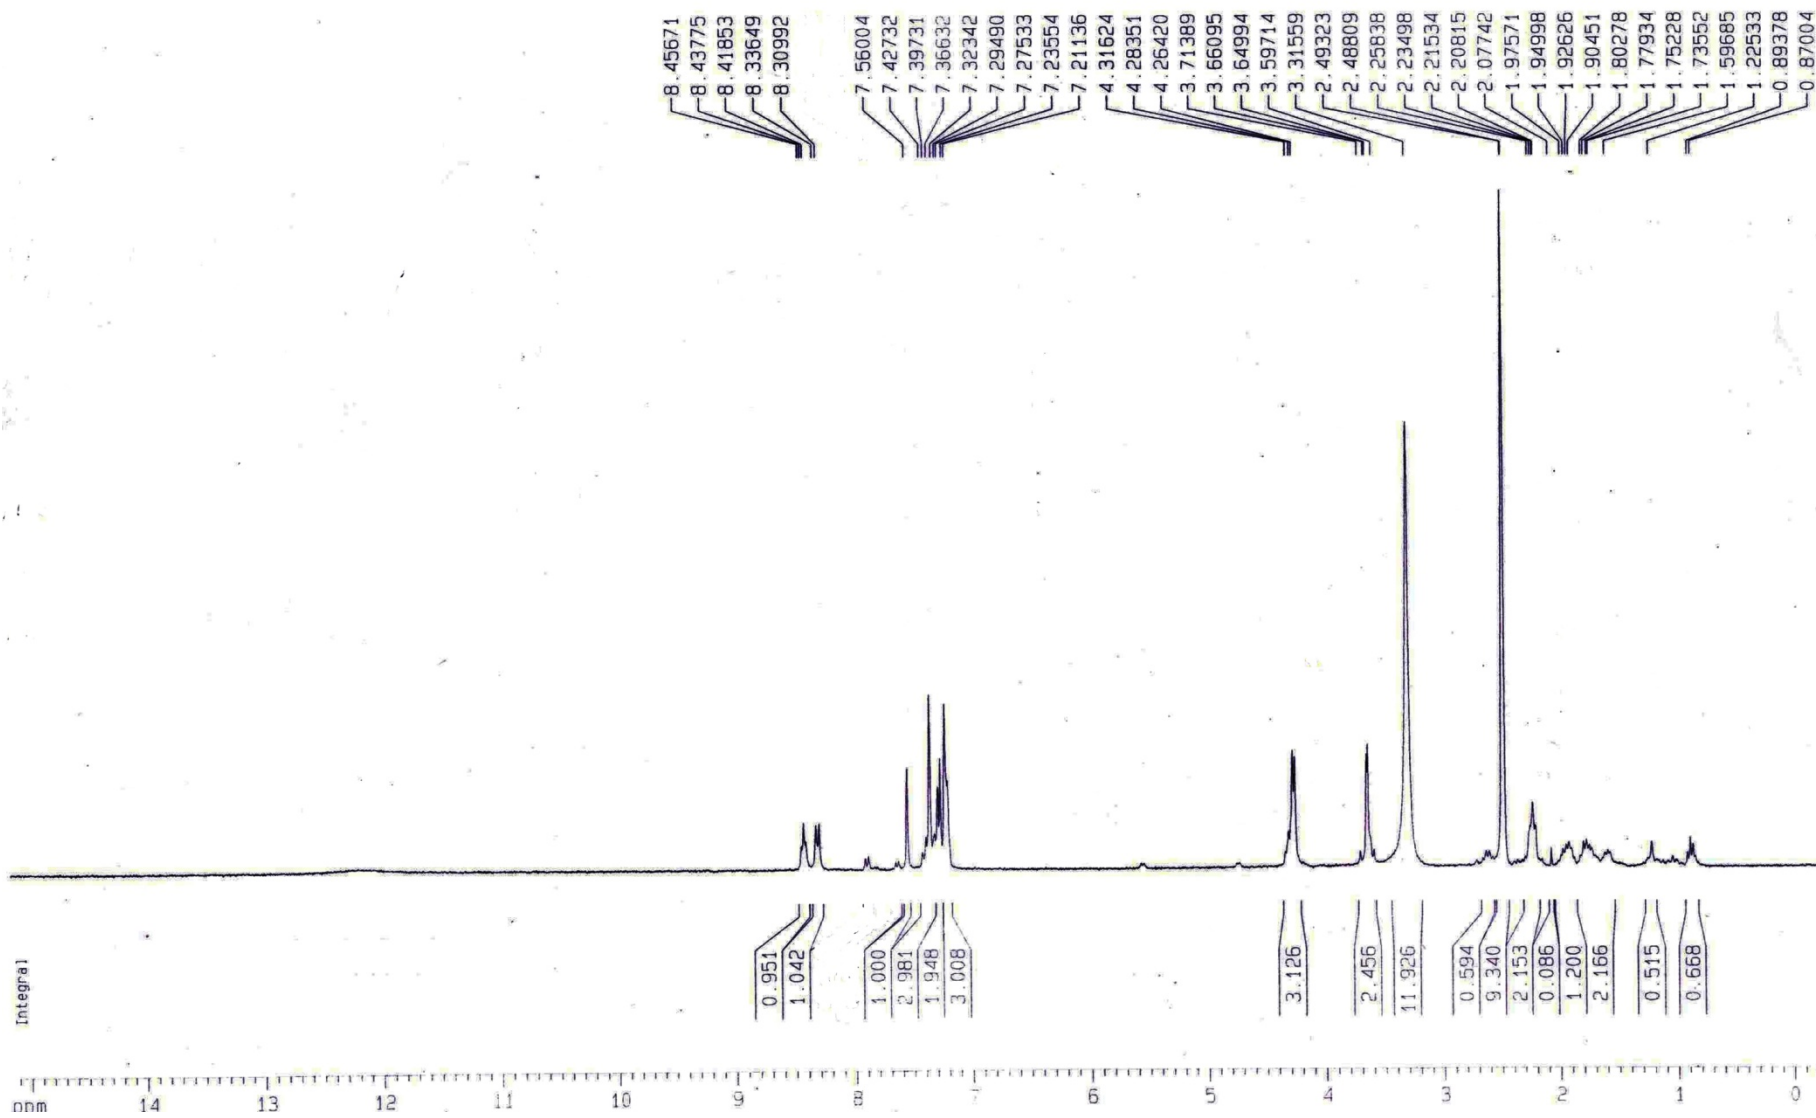

Figure TS10 <sup>1</sup>H NMR spectra of D24

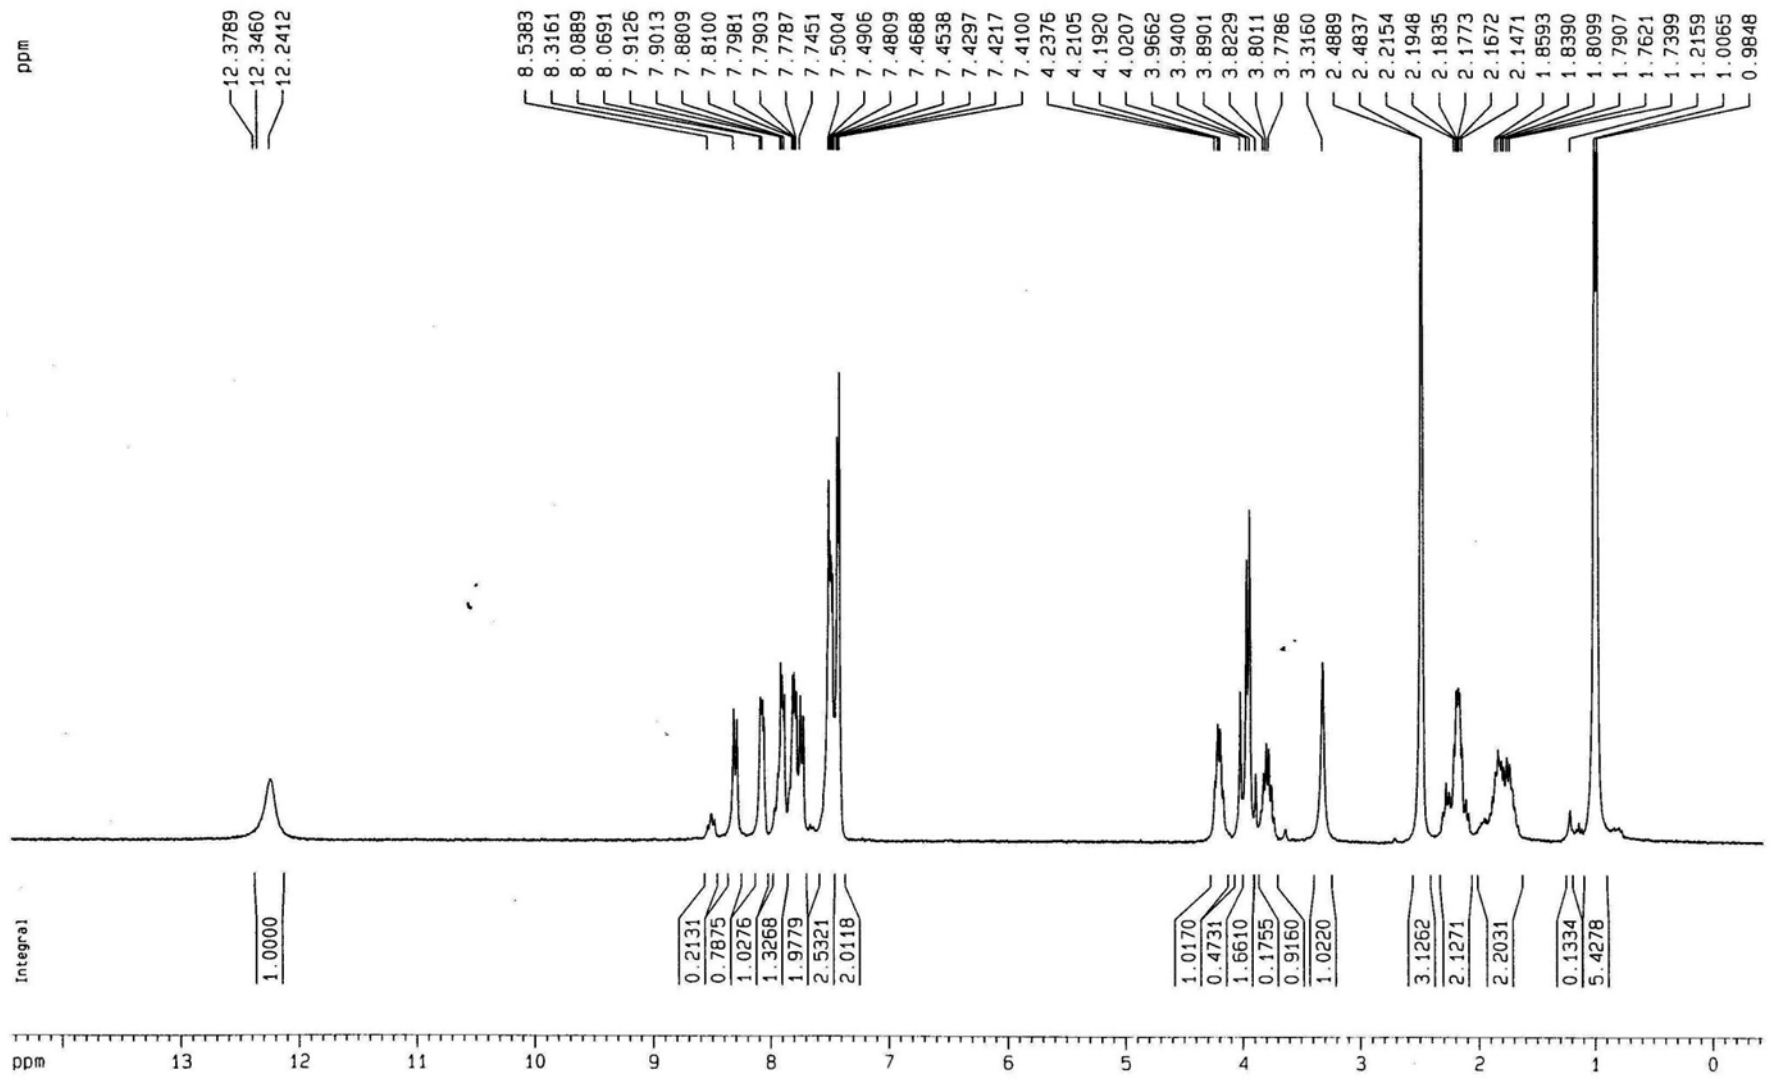

Figure TS11 <sup>1</sup>H NMR spectra of D27

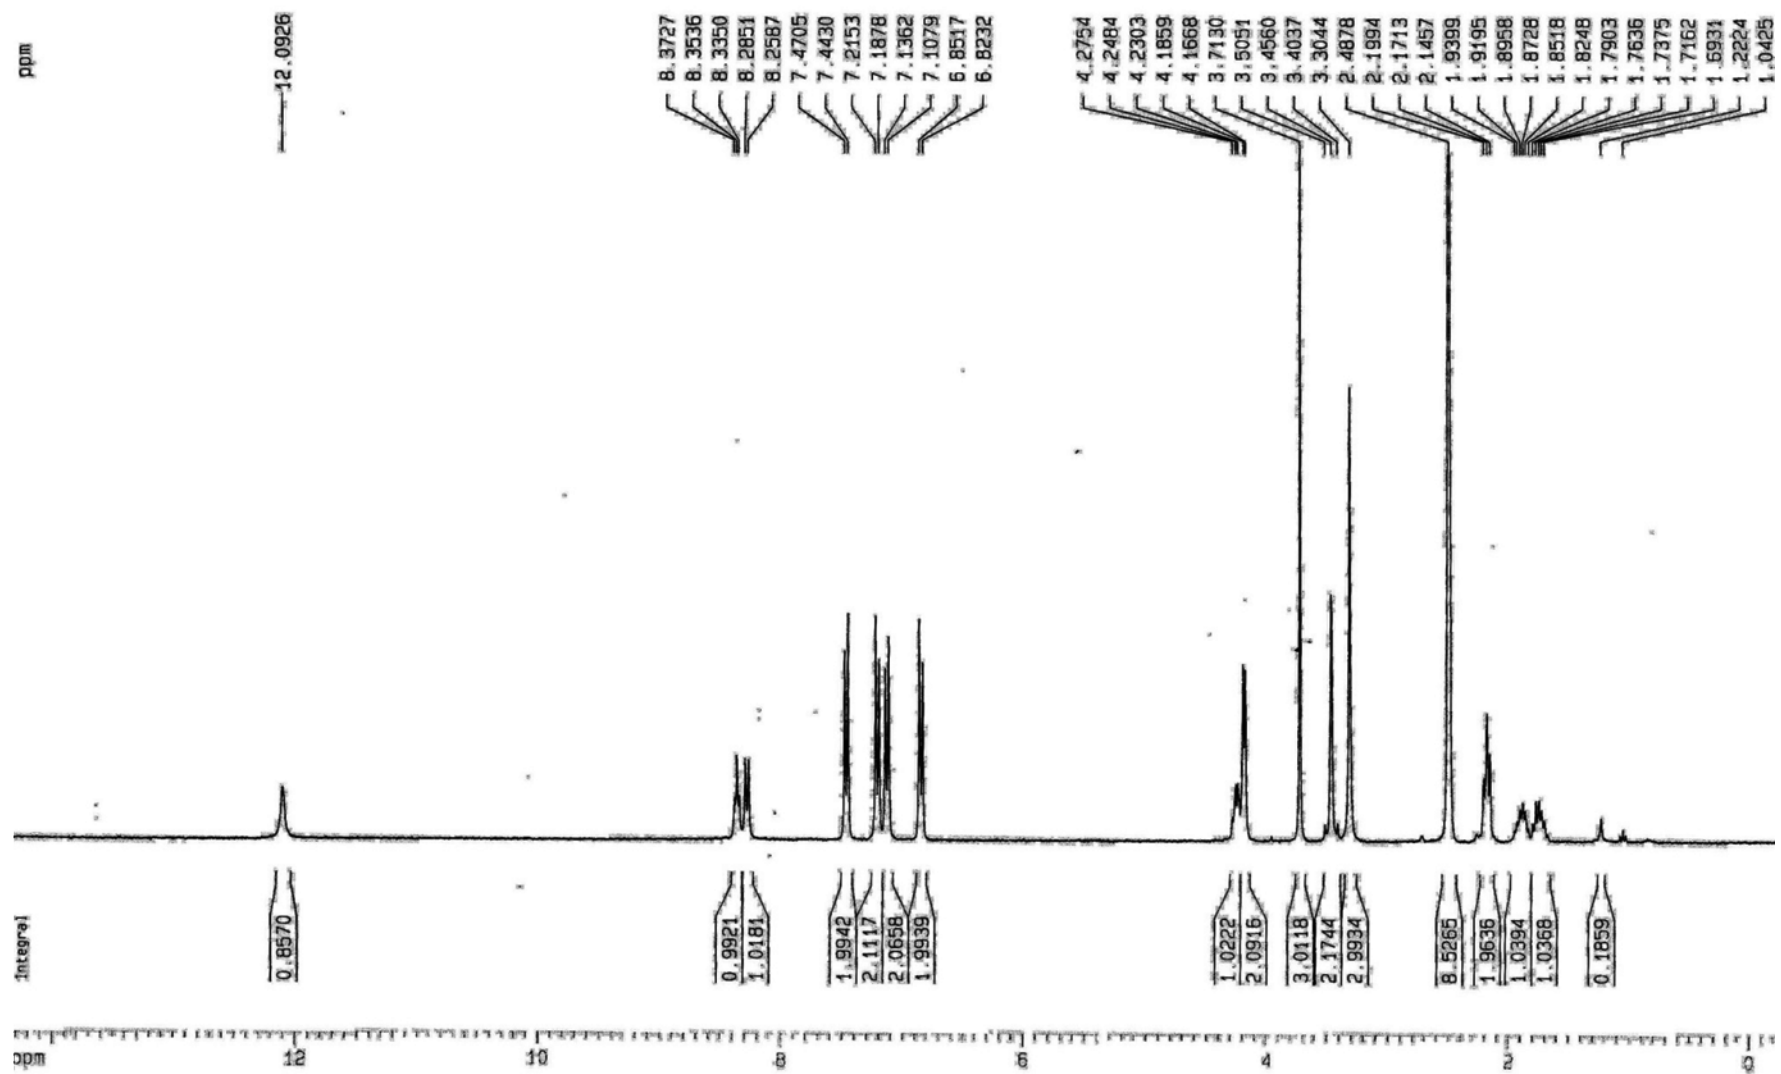

Figure TS12  $^1\text{H}$  NMR spectra of D34

## References

1. Y. Zhang, J. Feng, C. Liu, L. Zhang, J. Jiao, H. Fang, L. Su, X. Zhang, J. Zhang, M. Li, B. Wang and W. Xu. *Bioorg. Med. Chem.*, 2010, **18**, 1761-1776.
2. Y. Zhang, J. Feng, C. Liu, H. Fang and W. Xu. *Bioorg. Med. Chem.*, 2011, **19**, 4437-4444.
3. Y. Zhang, J. Feng, Y. Jia, Y. Xu, C. Liu, H. Fang and W. Xu. *Eur. J. Med. Chem.*, 2011, **46**, 5387-5397.
4. Y. Zhang, C. Liu, C. J. Chou, X. Wang, Y. Jia and W. Xu. *Chem. Biol. Drug Des.*, 2013, **82**, 125-130.
5. Y. Zhang, H. Fang, J. Feng, Y. Jia, X. Wang and W. Xu. *J. Med. Chem.*, 2011, **54**, 5532-9.
6. L. Whitehead, M. R. Dobler, B. Radetich, Y. Zhu, P. W. Atadja, T. Claiborne, J. E. Grob, A. McRiner, M. R. Pancost, A. Patnaik, W. Shao, M. Shultz, R. Tichkule, R. A. Tommasi, B. Vash, P. Wang and T. Stams, *Bioorg. Med. Chem.*, 2011, **19**, 4626-4634.
7. Accelrys Inc., Discovery Studio 3.0, San Diego, USA, 2011.
8. H. Li, J. Sutter and R. Hoffmann, in *Pharmacophore Perception, Development, and Use in Drug Design*. ed O. F. Güner, International University Line, CA, 2000, ch 10, pp. 173-189.
9. A. K. Halder, A. Saha and T. Jha, *J. Pharm. Pharmacol.*, 2013, **65**, 1541-1554.
10. H. M. Berman, J. Westbrook, Z. Feng, G. Gilliland, T. N. Bhat, H. Weissig, I. N. Shindyalov and P. E. Bourne. *Nucleic Acids Res.*, 2000, **28**, 235-242.
11. N. Huang, B. K. Scoichet and J. J. Irwin. *J. Med. Chem.*, 2006, **49**, 6789-6801.
12. J. R. Somoza, R. J. Skene, B. A. Katz, C. Mol, J. D. Ho, A. J. Jennings, C. Luong, A. Arvai, J. J. Buggy, E. Chi, J. Tang, B. C. Sang, E. Verner, R. Wynands, E. M. Leahy, D. R. Dougan, G. Snell, M. Navre, M. W. Knuth, R. V. Swanson, D. E. McRee and L. W. Tari. *Structure*, 2004, **12**, 1325-1334.
13. A. K. Halder, A. Saha, K. D. Saha and T. Jha. *J. Biomol. Str. Dyn.*, 2015, **33**, 1756-1779.
